# Supplementary material for: Inhibitors of SARS-CoV-2 Main Protease from a Library of Marine Natural Products: A Virtual Screening and Molecular Modeling Study
Source: Preprints.org preprint supplement (doi:10.20944/preprints202003.0372.v1), 2020-03-25
Supplement: Supplementary file 1 [file supplementary]

Supporting Information

# Inhibitors of SARS-CoV-2 Main Protease from a Library of Marine Natural Products: A Virtual Screening and Molecular Modeling Study

**Davide Gentile <sup>1,\*</sup>, Vincenzo Patamia <sup>1</sup>, Angela Scala <sup>2</sup>, Maria Teresa Sciortino <sup>2</sup>, Anna Piperno <sup>2</sup> and Antonio Rescifina <sup>1,3,\*</sup>**

<sup>1</sup> Department of Drug Sciences, University of Catania, V.le A. Doria, 95125 Catania, Italy, [davide.gentile@unict.it](mailto:davide.gentile@unict.it) (DG), [vincenzo.patamia@unict.it](mailto:vincenzo.patamia@unict.it) (VP) and [arescifina@unict.it](mailto:arescifina@unict.it) (AR)

<sup>2</sup> Department of Chemical, Biological, Pharmaceutical, and Environmental Sciences, University of Messina, V.le F. Stagno d'Alcontres 31, 98166 Messina, Italy, [ascala@unime.it](mailto:ascala@unime.it) (AS), [mtsciortino@unime.it](mailto:mtsciortino@unime.it) (MTS), [apiperno@unime.it](mailto:apiperno@unime.it) (AP)

<sup>3</sup> Consorzio Interuniversitario Nazionale di ricerca in Metodologie e Processi Innovativi di Sintesi (CINMPS), Via E. Orabona, 4, 70125 Bari, Italy; [arescifina@unict.it](mailto:arescifina@unict.it) (AR)

\* Correspondence: [davide.gentile@unict.it](mailto:davide.gentile@unict.it) (DG), [arescifina@unict.it](mailto:arescifina@unict.it) (AR)

## Table of content

|                                                                                                                                                                                    |     |
|------------------------------------------------------------------------------------------------------------------------------------------------------------------------------------|-----|
| <b>Figure S1.</b> Total energy, RMSDs, ligand interaction and docking binding pose of 76265-30-0                                                                                   | S2  |
| <b>Figure S2.</b> Total energy, RMSDs, ligand interaction and docking binding pose of 138551-15-2                                                                                  | S2  |
| <b>Figure S3.</b> Total energy, RMSDs, ligand interaction and docking binding pose of 202211-82-3                                                                                  | S3  |
| <b>Figure S4.</b> Total energy, RMSDs, ligand interaction and docking binding pose of 138529-06-3                                                                                  | S3  |
| <b>Figure S5.</b> Total energy, RMSDs, ligand interaction and docking binding pose of 137809-92-8                                                                                  | S4  |
| <b>Figure S6.</b> Total energy, RMSDs, ligand interaction and docking binding pose of Pentaphloretol B                                                                             | S4  |
| <b>Figure S7.</b> Total energy, RMSDs, ligand interaction and docking binding pose of 89445-12-5                                                                                   | S5  |
| <b>Figure S8.</b> Total energy, RMSDs, ligand interaction and docking binding pose of 36790-49-5                                                                                   | S5  |
| <b>Figure S9.</b> Total energy, RMSDs, ligand interaction and docking binding pose of 20633-84-5                                                                                   | S6  |
| <b>Figure S10.</b> Total energy, RMSDs, ligand interaction and docking binding pose of 88095-81-2                                                                                  | S6  |
| <b>Figure S11.</b> Total energy, RMSDs, ligand interaction and docking binding pose of 88095-77-6                                                                                  | S7  |
| <b>Figure S12.</b> Total energy, RMSDs, ligand interaction and docking binding pose of 224577-36-0                                                                                 | S7  |
| <b>Figure S13.</b> Total energy, RMSDs, ligand interaction and docking binding pose of 167228-01-5                                                                                 | S8  |
| <b>Figure S14.</b> Total energy, RMSDs, ligand interaction and docking binding pose of 144027-79-2                                                                                 | S8  |
| <b>Figure S15.</b> Total energy, RMSDs, ligand interaction and docking binding pose of 164176-23-2                                                                                 | S9  |
| <b>Figure S16.</b> Total energy, RMSDs, ligand interaction and docking binding pose of 115982-31-5                                                                                 | S9  |
| <b>Figure S17.</b> Total energy, RMSDs, ligand interaction and docking binding pose of 224577-35-9                                                                                 | S10 |
| <b>Figure S18.</b> Total energy, RMSDs, ligand interaction and docking binding pose of N3                                                                                          | S10 |
| <b>Figure S19.</b> Total energy, RMSDs, ligand interaction and docking binding pose of 92727                                                                                       | S11 |
| <b>Table S1.</b> Virtual screening of chemical structures of the marine dataset that passed the pharmacophore filter including the contacting receptor residues and binding energy | S11 |

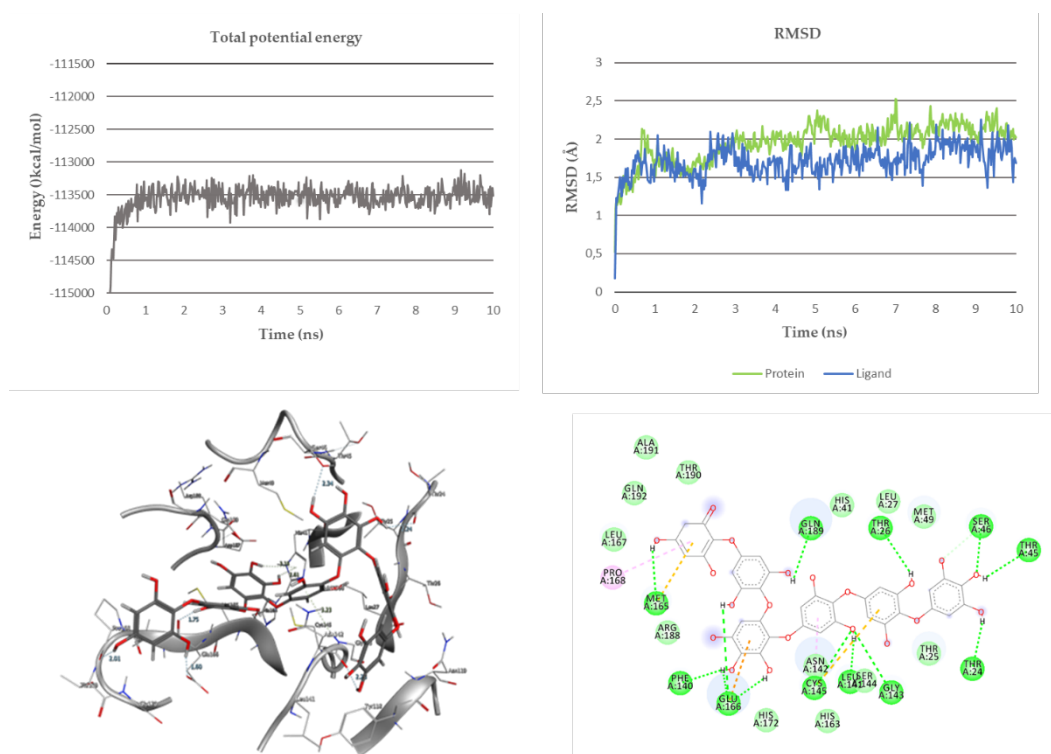

**Figure S1.** MNP ID 76265-30-0. Total energy (up-left) and RMSDs (up-right) of M<sup>Pro</sup> enzyme and its complexes with ligand. Docking binding pose (down-left) and Interaction (down-right) inside the binding pocket of M<sup>Pro</sup> enzyme.

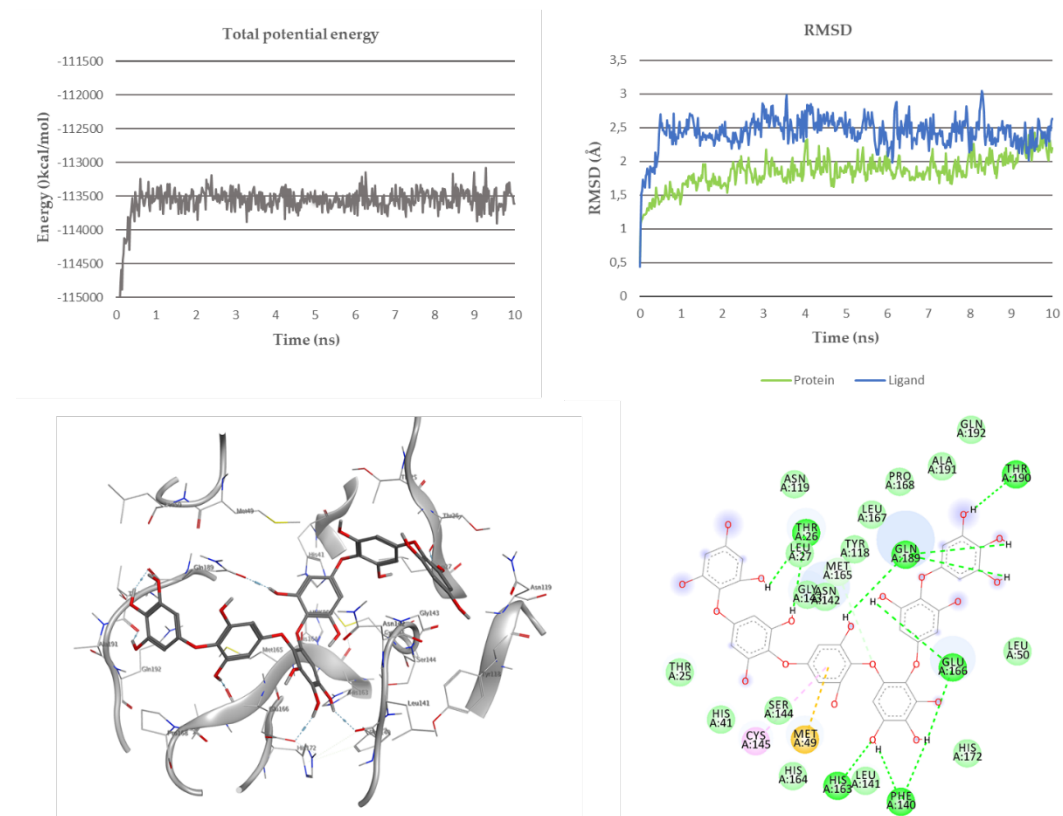

**Figure S2.** MNP ID 138551-15-2. Total energy (up-left) and RMSDs (up-right) of M<sup>Pro</sup> enzyme and its complexes with ligand. Docking binding pose (down-left) and Interaction (down-right) inside the binding pocket of M<sup>Pro</sup> enzyme.

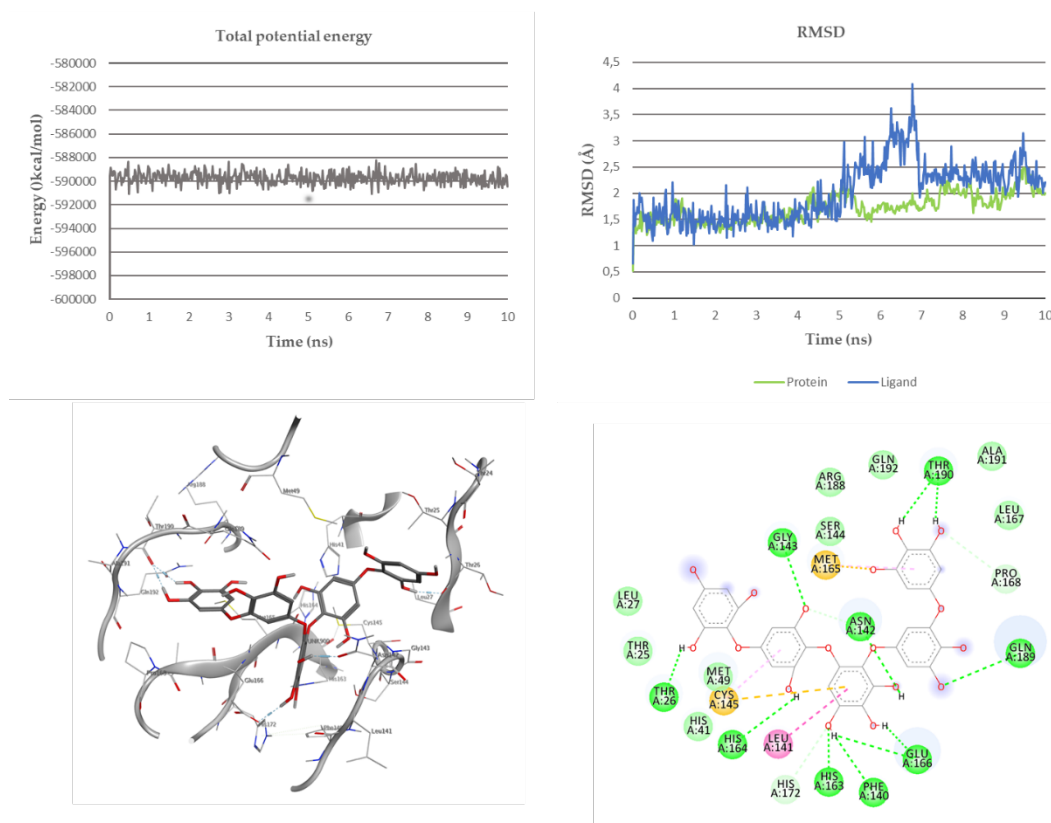

**Figure S3.** MNP ID 202211-82-3. Total energy (up-left) and RMSDs (up-right) of M<sup>pro</sup> enzyme and its complexes with ligand. Docking binding pose (down-left) and Interaction (down-right) inside the binding pocket of M<sup>pro</sup> enzyme.

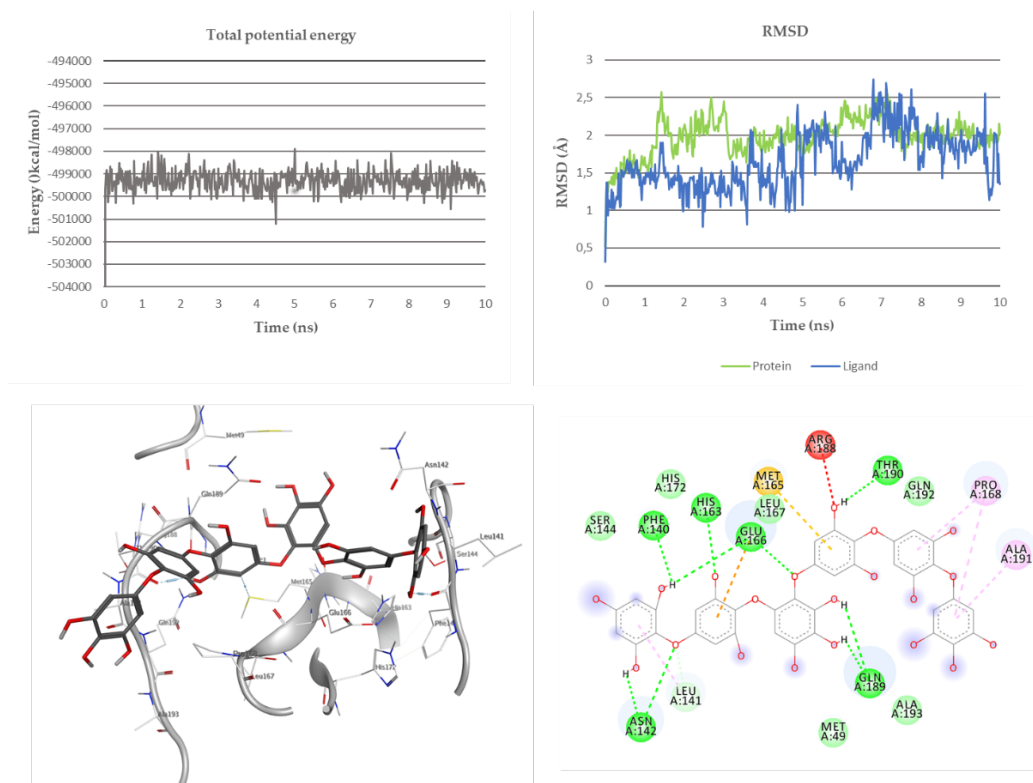

**Figure S4.** MNP ID 138529-06-3. Total energy (up-left) and RMSDs (up-right) of M<sup>pro</sup> enzyme and its complexes with ligand. Docking binding pose (down-left) and Interaction (down-right) inside the binding pocket of M<sup>pro</sup> enzyme.

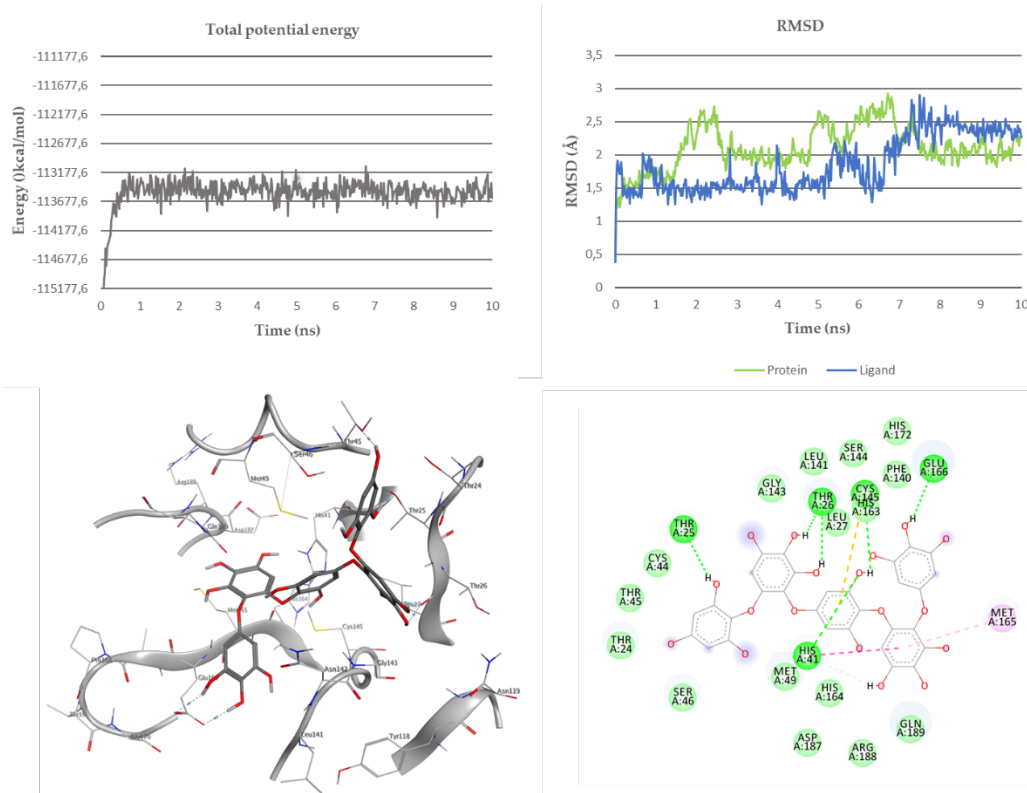

**Figure S5.** MNP ID 137809-92-8. Total energy (up-left) and RMSDs (up-right) of M<sup>pro</sup> enzyme and its complexes with ligand. Docking binding pose (down-left) and Interaction (down-right) inside the binding pocket of M<sup>pro</sup> enzyme.

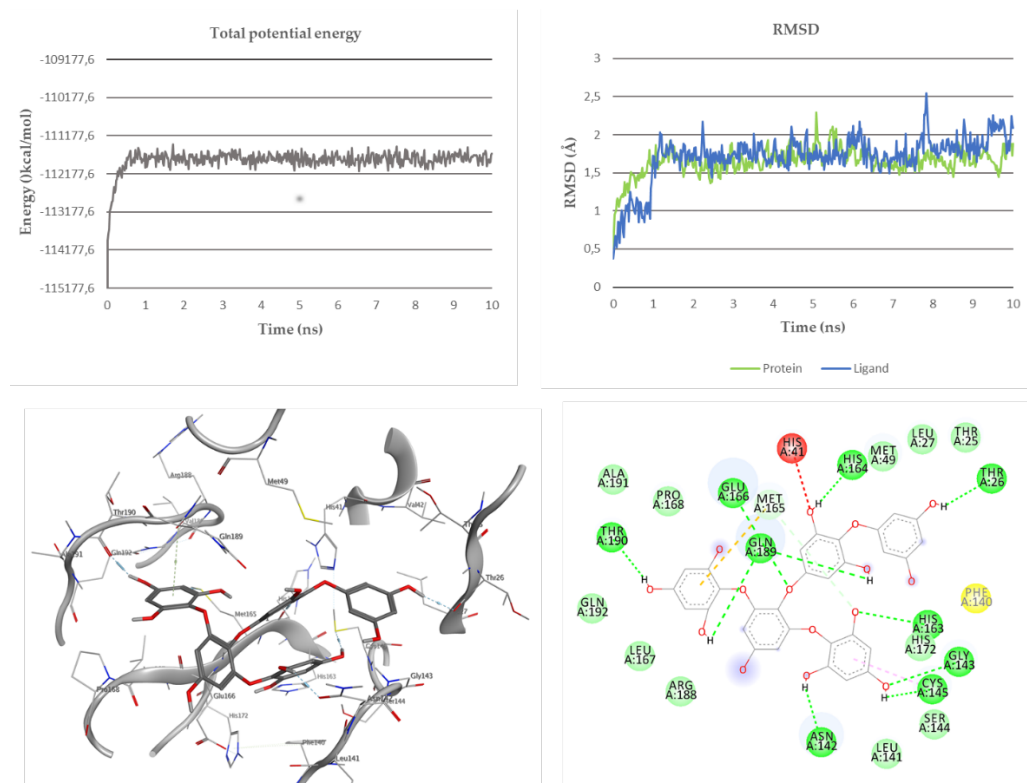

**Figure S6.** MNP ID Pentaphlorethol B. Total energy (up-left) and RMSDs (up-right) of M<sup>pro</sup> enzyme and its complexes with ligand. Docking binding pose (down-left) and Interaction (down-right) inside the binding pocket of M<sup>pro</sup> enzyme.

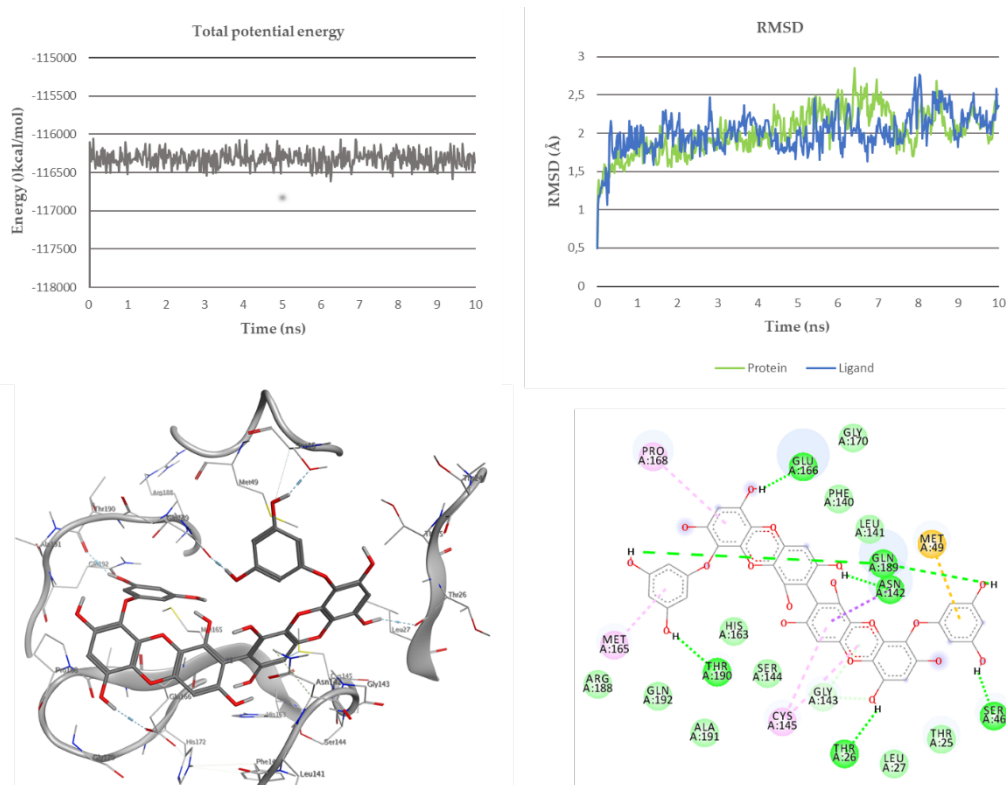

**Figure S7.** MNP ID 89445-12-5. Total energy (up-left) and RMSDs (up-right) of M<sup>Pro</sup> enzyme and its complexes with ligand. Docking binding pose (down-left) and Interaction (down-right) inside the binding pocket of M<sup>Pro</sup> enzyme.

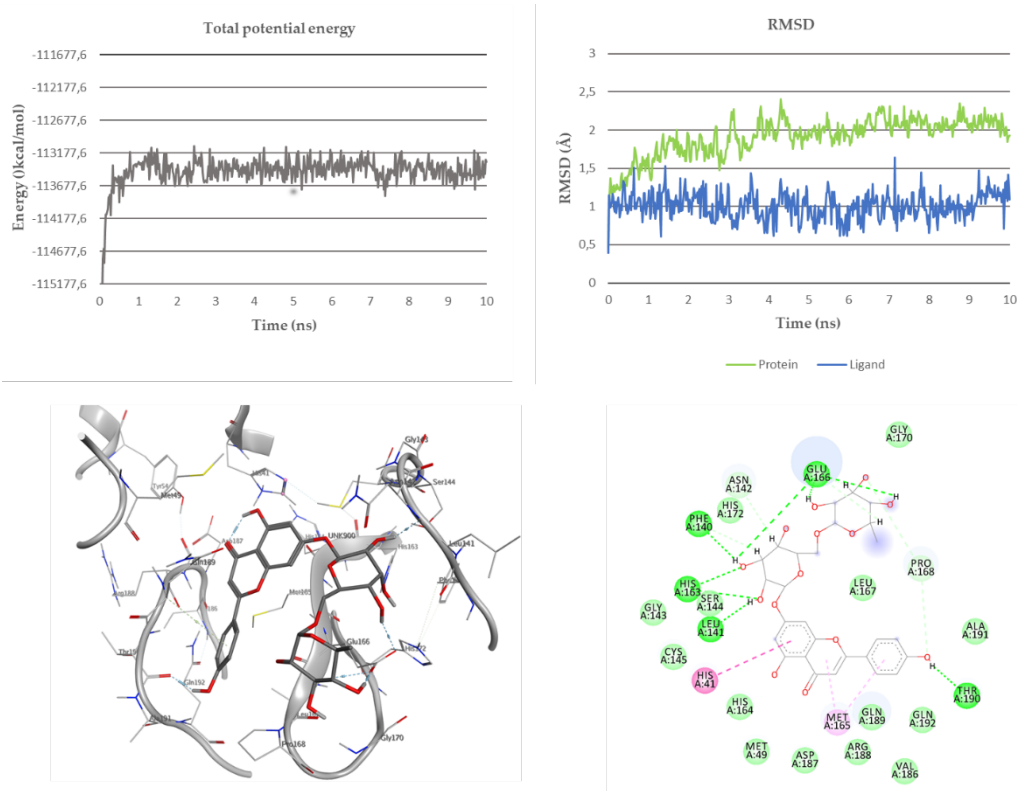

**Figure S8.** MNP ID 36790-49-5. Total energy (up-left) and RMSDs (up-right) of M<sup>Pro</sup> enzyme and its complexes with ligand. Docking binding pose (down-left) and Interaction (down-right) inside the binding pocket of M<sup>Pro</sup> enzyme.

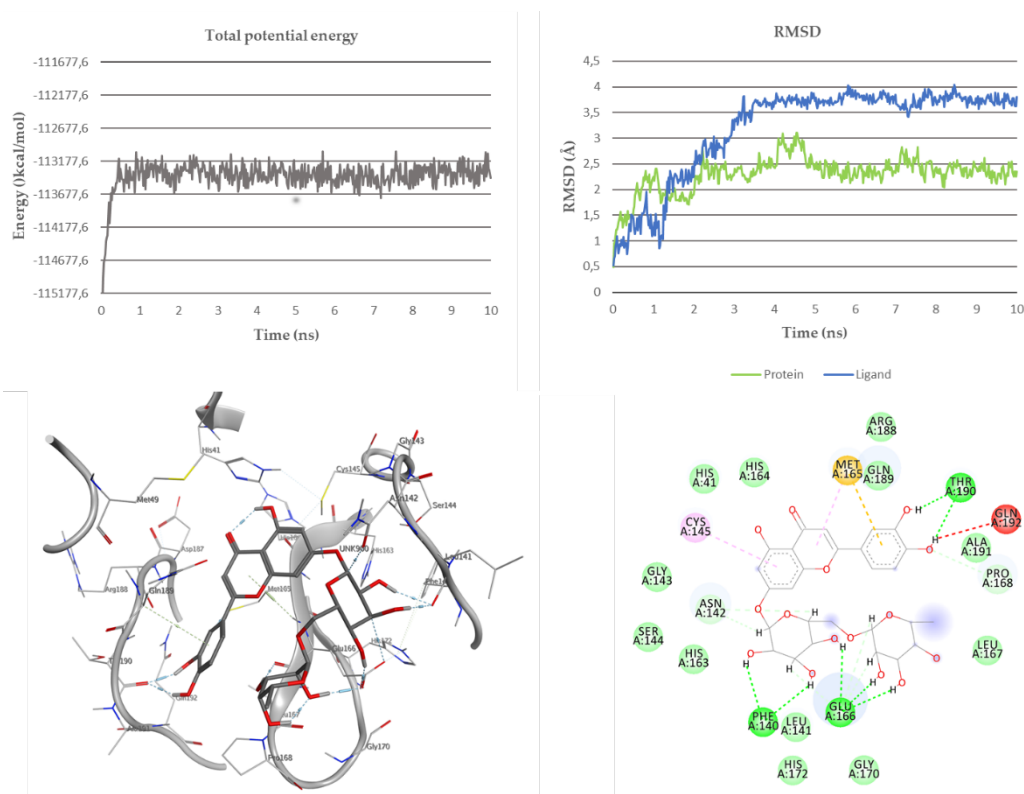

**Figure S9.** MNP ID 20633-84-5. Total energy (up-left) and RMSDs (up-right) of M<sup>pro</sup> enzyme and its complexes with ligand. Docking binding pose (down-left) and Interaction (down-right) inside the binding pocket of M<sup>pro</sup> enzyme.

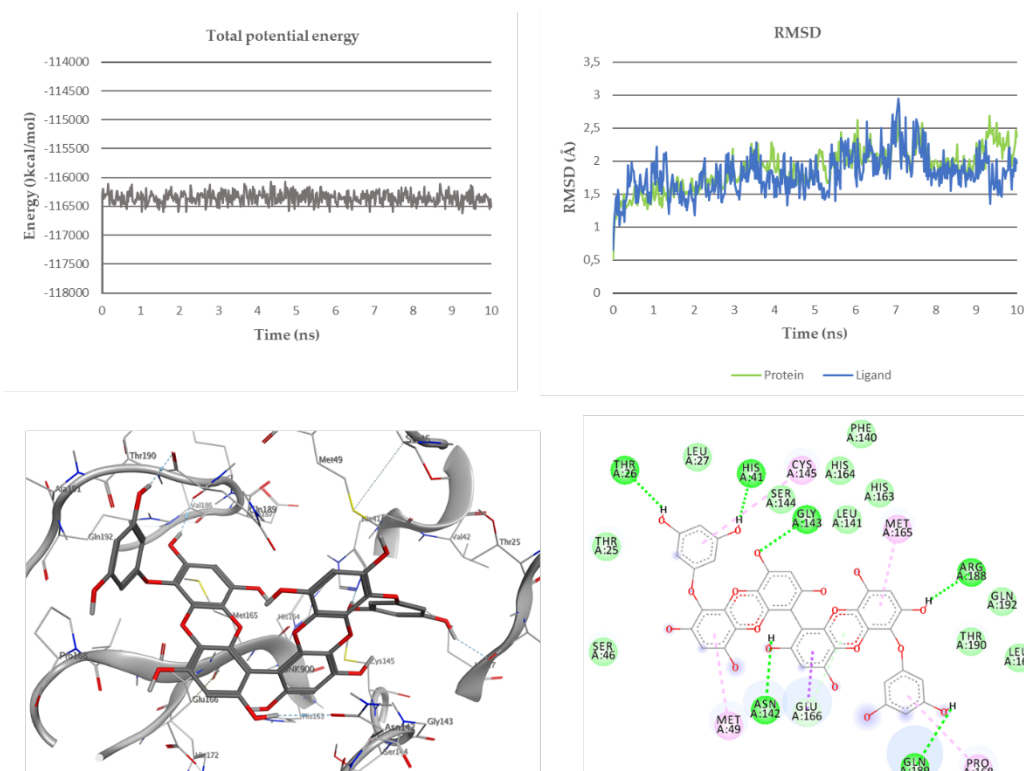

**Figure S10.** MNP ID 88095-81-2. Total energy (up-left) and RMSDs (up-right) of M<sup>pro</sup> enzyme and its complexes with ligand. Docking binding pose (down-left) and Interaction (down-right) inside the binding pocket of M<sup>pro</sup> enzyme.



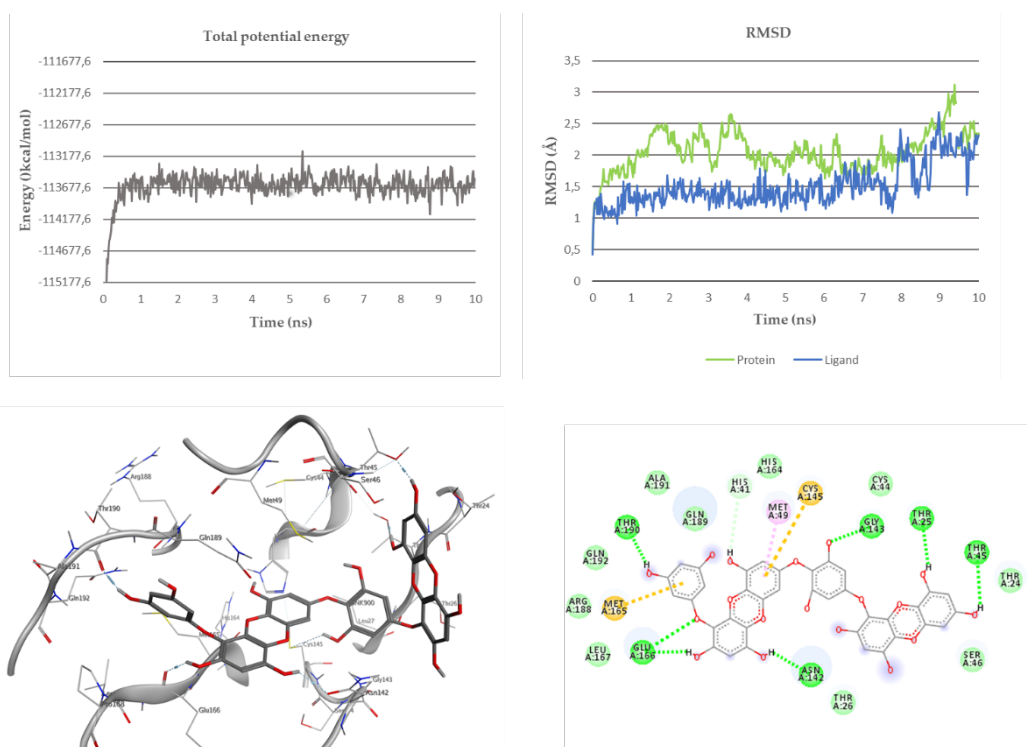

**Figure S11. MNP ID 88095-81-2.** Total energy (up-left) and RMSDs (up-right) of M<sup>pro</sup> enzyme and its complexes with ligand. Docking binding pose (down-left) and Interaction (down-right) inside the binding pocket of M<sup>pro</sup> enzyme.

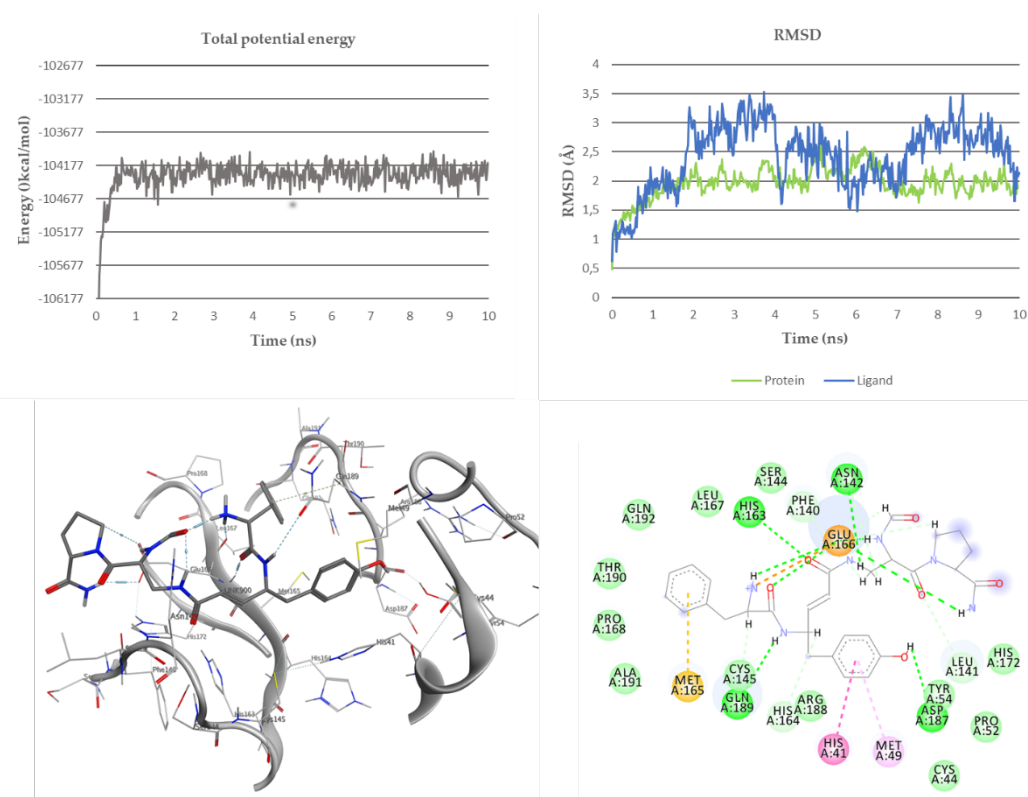

**Figure S12. MNP ID 224577-36-0.** Total energy (up-left) and RMSDs (up-right) of M<sup>pro</sup> enzyme and its complexes with ligand. Docking binding pose (down-left) and Interaction (down-right) inside the binding pocket of M<sup>pro</sup> enzyme.

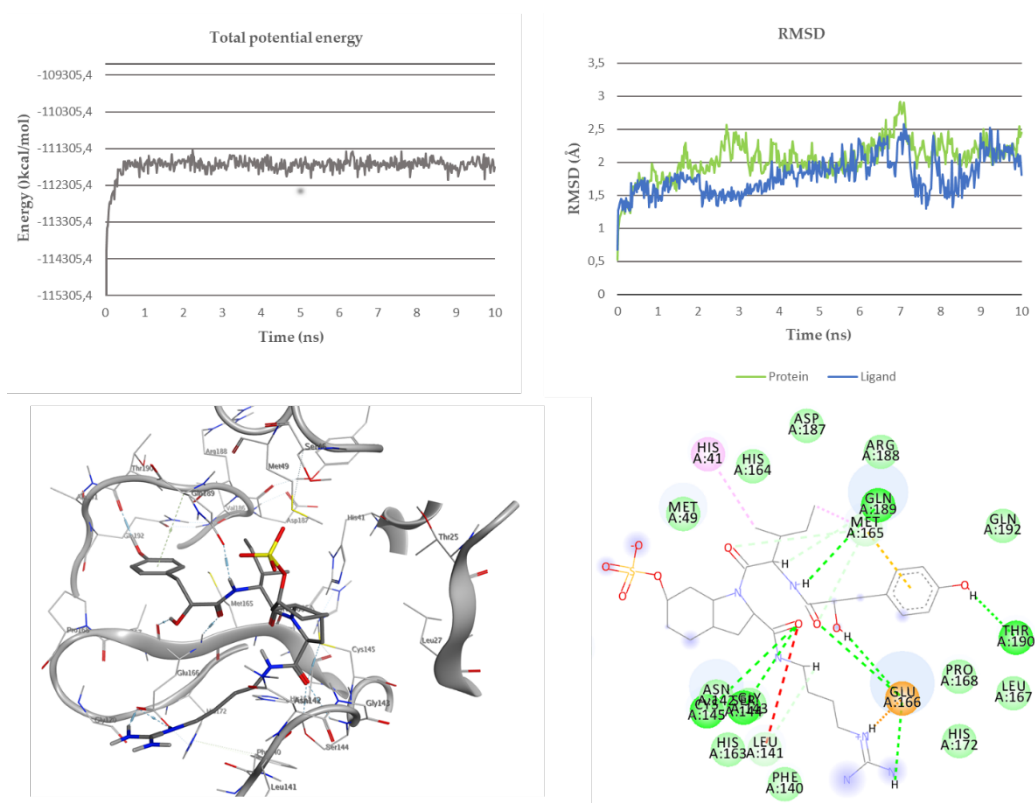

**Figure S13.** MNP ID 167228-01-5. Total energy (up-left) and RMSDs (up-right) of M<sup>Pro</sup> enzyme and its complexes with ligand. Docking binding pose (down-left) and Interaction (down-right) inside the binding pocket of M<sup>Pro</sup> enzyme.

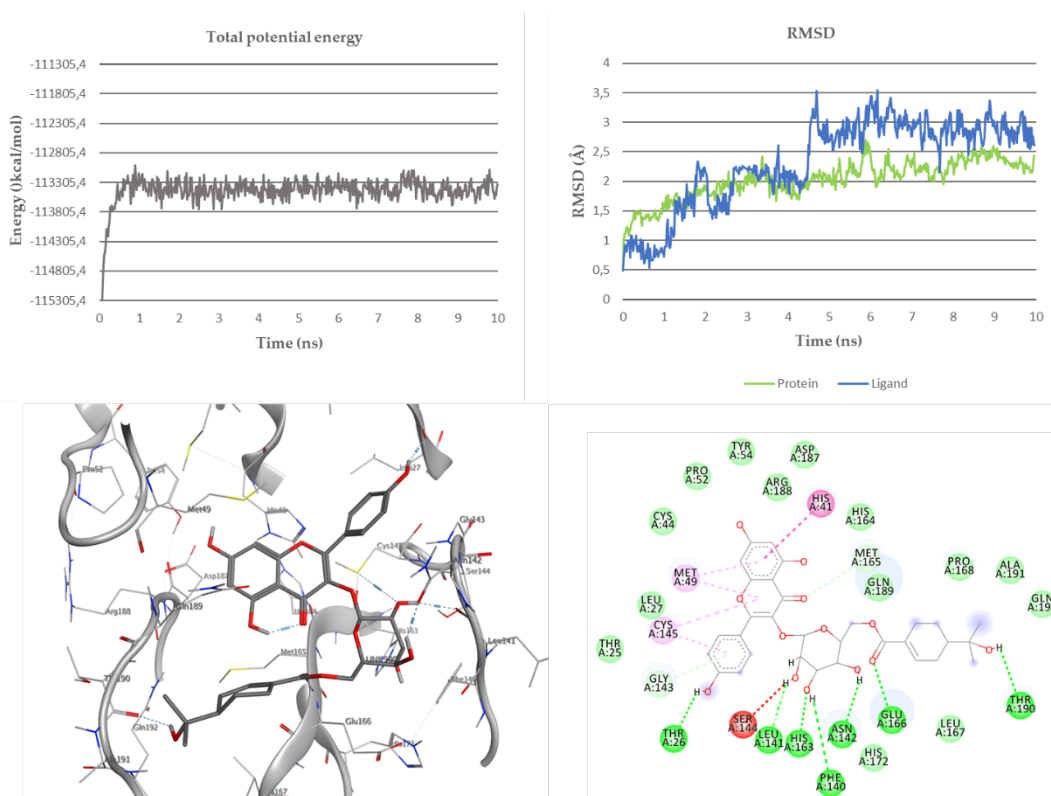

**Figure S14.** MNP ID 144027-79-2. Total energy (up-left) and RMSDs (up-right) of M<sup>Pro</sup> enzyme and its complexes with ligand. Docking binding pose (down-left) and Interaction (down-right) inside the binding pocket of M<sup>Pro</sup> enzyme.



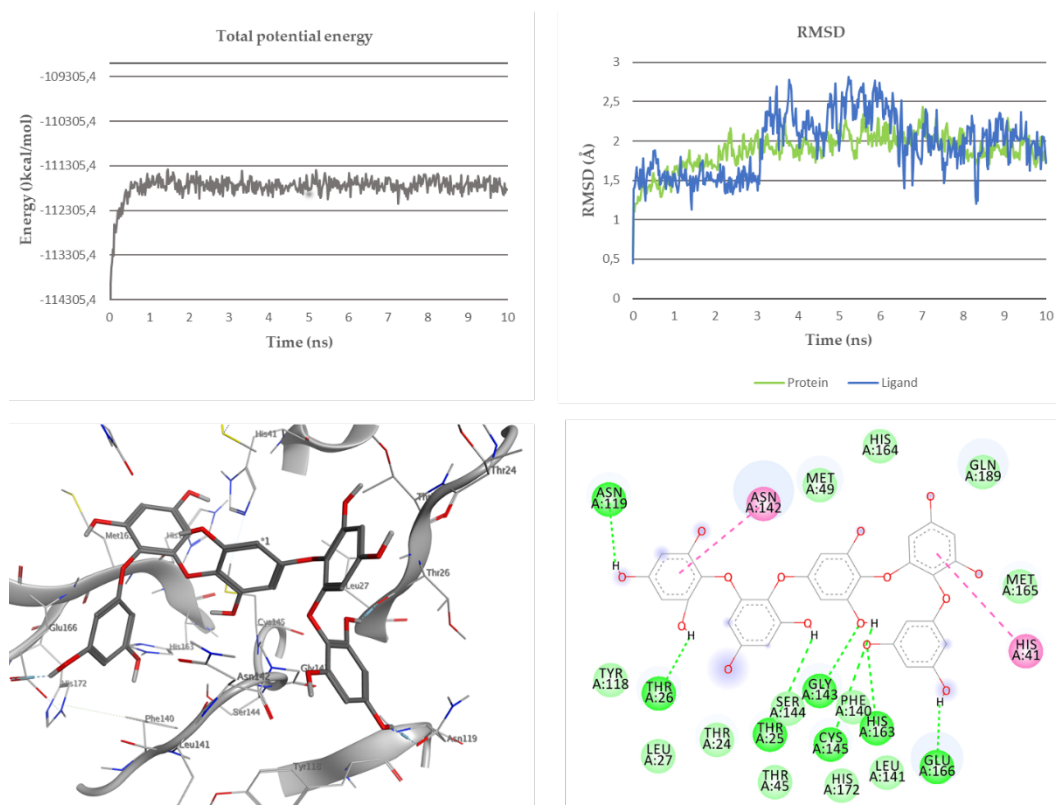

**Figure S15.** MNP ID 164176-23-2. Total energy (up-left) and RMSDs (up-right) of M<sup>Pro</sup> enzyme and its complexes with ligand. Docking binding pose (down-left) and Interaction (down-right) inside the binding pocket of M<sup>Pro</sup> enzyme.

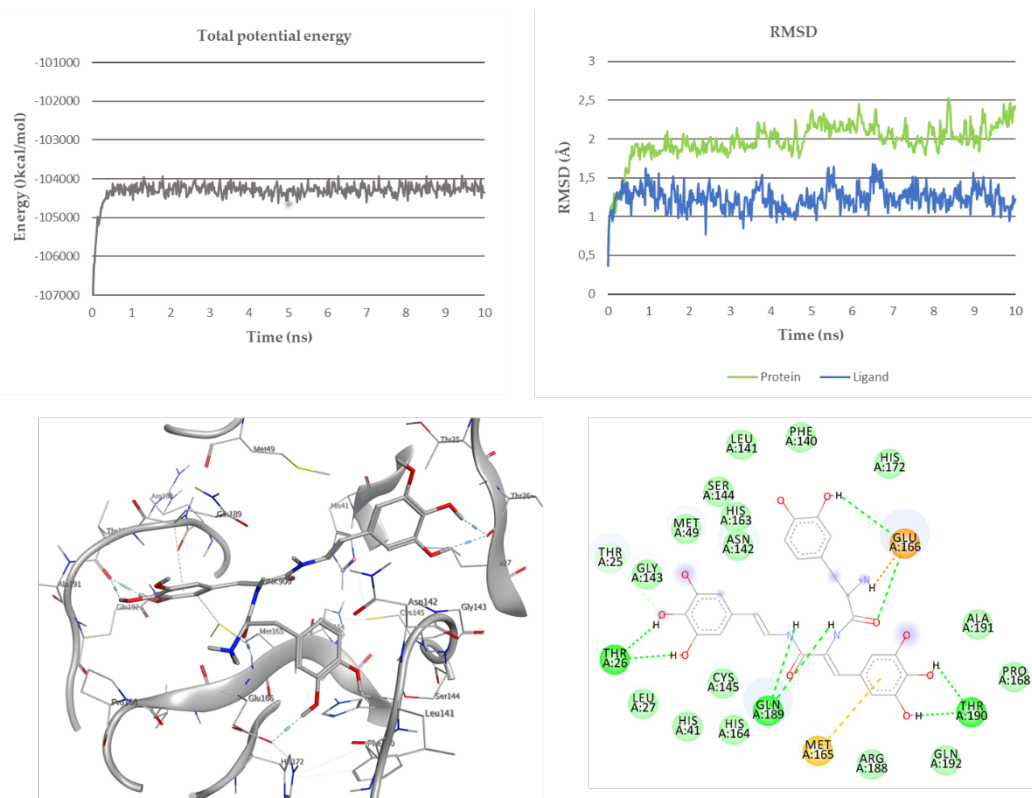

**Figure S16.** MNP ID 115982-31-5. Total energy (up-left) and RMSDs (up-right) of M<sup>Pro</sup> enzyme and its complexes with ligand. Docking binding pose (down-left) and Interaction (down-right) inside the binding pocket of M<sup>Pro</sup> enzyme.

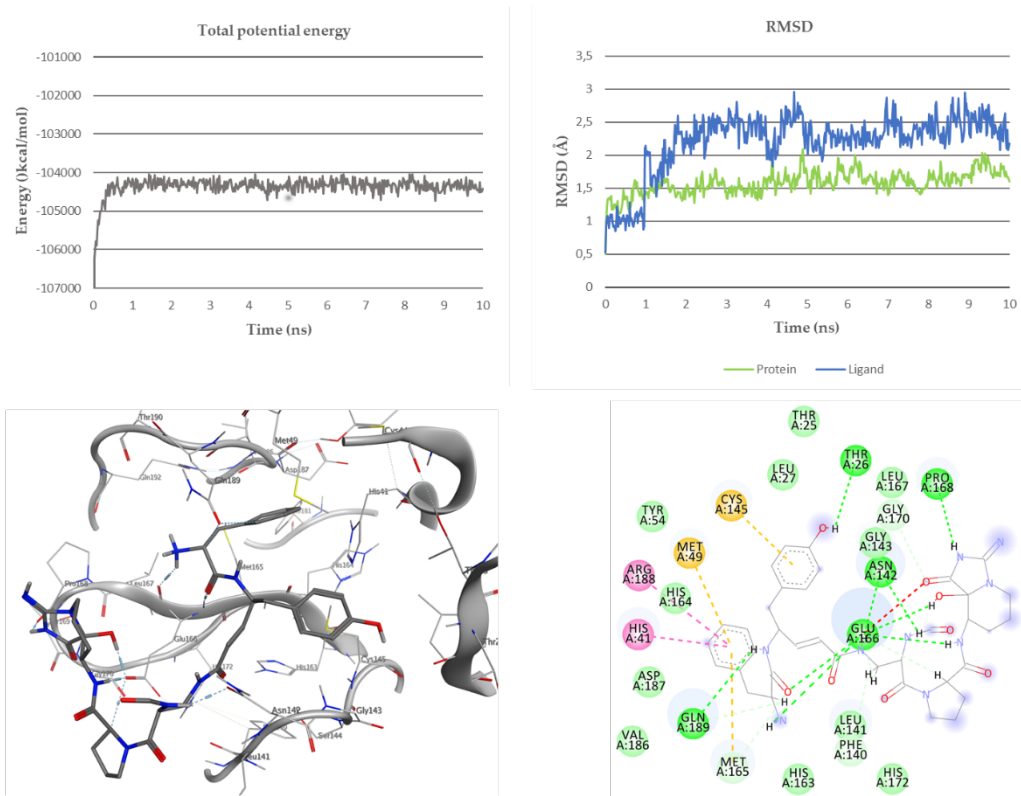

**Figure S17.** MNP ID 224577-35-9. Total energy (up-left) and RMSDs (up-right) of M<sup>Pro</sup> enzyme and its complexes with ligand. Docking binding pose (down-left) and Interaction (down-right) inside the binding pocket of M<sup>Pro</sup> enzyme.

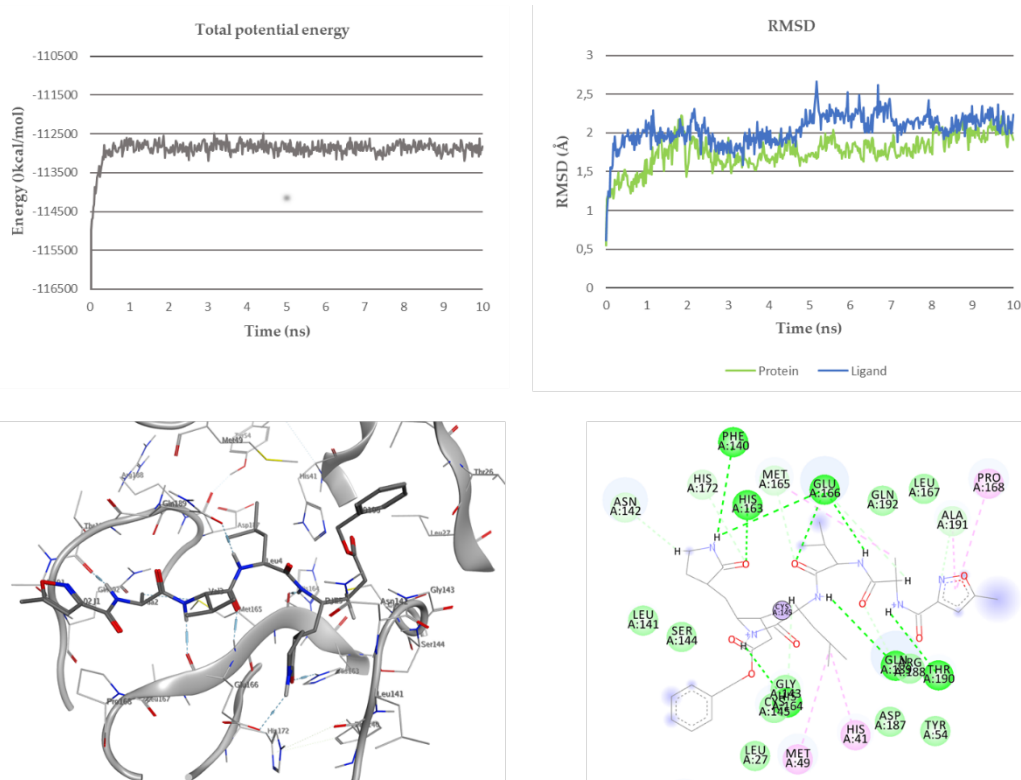

**Figure S18.** PRD\_002214. Total energy (up-left) and RMSDs (up-right) of M<sup>Pro</sup> enzyme and its complexes with ligand. Docking binding pose (down-left) and Interaction (down-right) inside the binding pocket of M<sup>Pro</sup> enzyme.

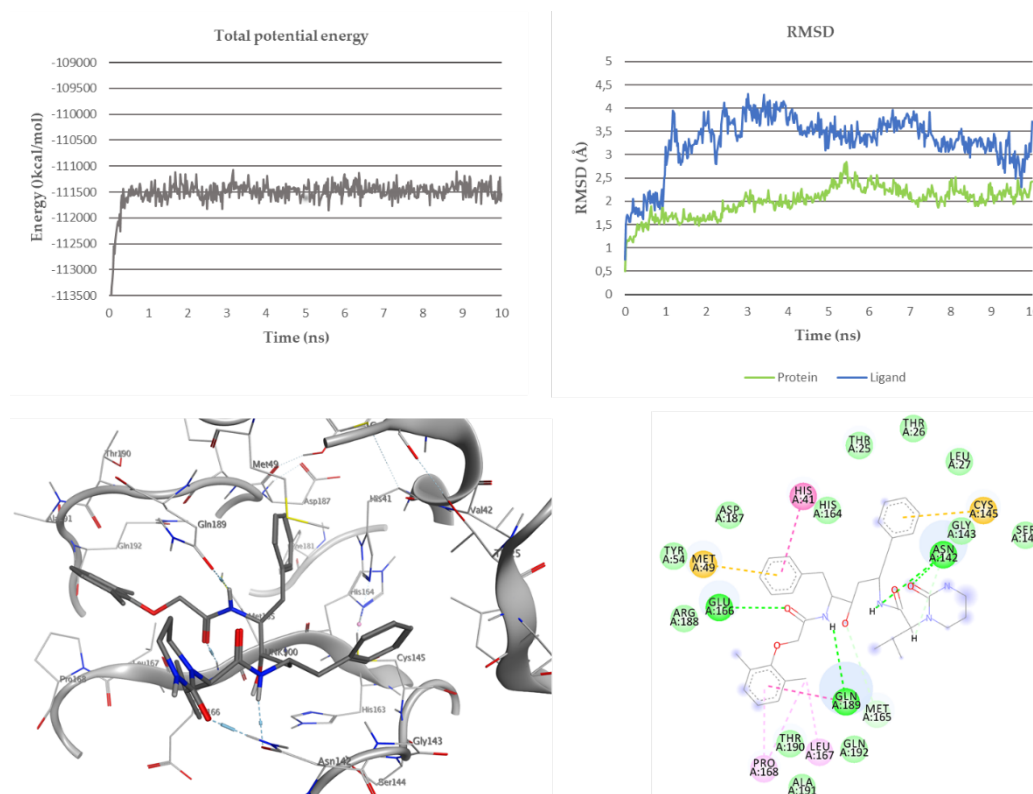

**Figure S19.** MNP ID 224577-35-9. Total energy (up-left) and RMSDs (up-right) of M<sup>pro</sup> enzyme and its complexes with ligand. Docking binding pose (down-left) and Interaction (down-right) inside the binding pocket of M<sup>pro</sup> enzyme.

**Table S1.** Virtual screening of chemical structures of the marine dataset that passed the pharmacophore filter including the contacting receptor residues and binding energy.

| MNP ID <sup>a</sup> | Contacting receptor residues                                                                                                                                                                                                                      | Binding Energy (kcal/mol) Vina |
|---------------------|---------------------------------------------------------------------------------------------------------------------------------------------------------------------------------------------------------------------------------------------------|--------------------------------|
| 78798-08-0          | A THR 25 A THR 26 A LEU 27 A MET 49 A PHE 140 A LEU 141 A ASN 142 A GLY 143 A SER 144 A CYS 145 A HIS 163 A HIS 164 A MET 165 A GLU 166 A LEU 167 A PRO 168 A HIS 172 A ARG 188 A GLN 189 A THR 190 A ALA 191 A GLN 192                           | -10.18                         |
| 211686-51-0         | A THR 24 A THR 25 A THR 26 A HIS 41 A MET 49 A TYR 118 A ASN 119 A PHE 140 A LEU 141 A ASN 142 A GLY 143 A SER 144 A CYS 145 A HIS 163 A MET 165 A GLU 166 A LEU 167 A PRO 168 A HIS 172 A GLN 189 A THR 190 A ALA 191                            | -10.00                         |
| 40663-80-7          | A THR 24 A THR 25 A THR 26 A LEU 27 A HIS 41 A THR 45 A SER 46 A MET 49 A PHE 140 A LEU 141 A ASN 142 A GLY 143 A SER 144 A CYS 145 A HIS 163 A HIS 164 A MET 165 A GLU 166 A LEU 167 A PRO 168 A HIS 172 A GLN 189 A THR 190 A ALA 191 A GLN 192 | -9.95                          |
| 1008752-06-         | A PHE 140 A LEU 141 A ASN 142 A GLY 143 A SER 144 A CYS 145 A HIS 163 A HIS 164 A MET 165 A GLU 166 A LEU 167 A PRO 168 A GLN 189 A THR 190                                                                                                       | -9.62                          |
| 104196-68-1         | A HIS 41 A TYR 54 A PHE 140 A LEU 141 A ASN 142 A SER 144 A CYS 145 A HIS 163 A HIS 164 A MET 165 A GLU 166 A PRO 168 A HIS 172 A ASP 187 A ARG 188 A GLN 189 A THR 190 A GLN 192                                                                 | -9.61                          |

|             |                                                                                                                                                                                                                                           |       |
|-------------|-------------------------------------------------------------------------------------------------------------------------------------------------------------------------------------------------------------------------------------------|-------|
| 07900-75-4  | A PHE 140 A LEU 141 A ASN 142 A GLY 143 A SER 144 A CYS 145 A HIS 163 A HIS 164 A MET 165 A GLU 166 A LEU 167 A PRO 168 A GLN 189 A THR 190                                                                                               | −9.61 |
| 144027-79-2 | A THR 25 A THR 26 A LEU 27 A HIS 41 A MET 49 A TYR 54 A PHE 140 A LEU 141 A ASN 142 A GLY 143 A SER 144 A CYS 145 A HIS 163 A MET 165 A GLU 166 A LEU 167 A PRO 168 A HIS 172 A ASP 187 A ARG 188 A GLN 189 A THR 190 A ALA 191 A GLN 192 | −9.56 |
| 858950-40-0 | A THR 25 A THR 26 A LEU 27 A HIS 41 A MET 49 A ASN 142 A GLY 143 A SER 144 A CYS 145 A HIS 163 A HIS 164 A MET 165 A GLU 166 A LEU 167 A PRO 168 A ARG 188 A GLN 189 A THR 190 A ALA 191 A GLN 192                                        | −9.56 |
| 18115-90-7  | A MET 49 A PHE 140 A LEU 141 A ASN 142 A GLY 143 A SER 144 A CYS 145 A HIS 163 A HIS 164 A MET 165 A GLU 166 A LEU 167 A PRO 168 A HIS 172 A ARG 188 A GLN 189                                                                            | −9.43 |
| 152845-74-4 | A THR 25 A THR 26 A LEU 27 A HIS 41 A MET 49 A LEU 141 A ASN 142 A GLY 143 A CYS 145 A MET 165 A GLU 166 A PRO 168 A ARG 188 A GLN 189 A THR 190 A GLN 192                                                                                | −9.35 |
| 58950-46-6  | A THR 25 A THR 26 A LEU 27 A HIS 41 A MET 49 A LEU 141 A ASN 142 A GLY 143 A SER 144 A CYS 145 A HIS 164 A MET 165 A GLU 166 A LEU 167 A PRO 168 A ARG 188 A GLN 189 A THR 190                                                            | −9.31 |
| 147716-81-2 | A THR 24 A THR 25 A THR 26 A LEU 27 A HIS 41 A THR 45 A SER 46 A MET 49 A PHE 140 A LEU 141 A ASN 142 A GLY 143 A SER 144 A CYS 145 A HIS 163 A MET 165 A GLU 166 A HIS 172 A GLN 189                                                     | −9.29 |
| 151379-39-4 | A THR 24 A THR 25 A THR 26 A LEU 27 A HIS 41 A THR 45 A SER 46 A MET 49 A PHE 140 A LEU 141 A ASN 142 A GLY 143 A SER 144 A CYS 145 A HIS 163 A MET 165 A GLU 166 A HIS 172 A GLN 189                                                     | −9.28 |
| 79849-37-9  | A THR 25 A THR 26 A LEU 27 A HIS 41 A VAL 42 A MET 49 A ASN 142 A GLY 143 A SER 144 A CYS 145 A HIS 164 A MET 165 A GLU 166 A LEU 167 A PRO 168 A ARG 188 A GLN 189 A THR 190 A ALA 191 A GLN 192                                         | −9.22 |
| 134458-00-7 | A THR 25 A LEU 27 A HIS 41 A MET 49 A ASN 142 A GLY 143 A CYS 145 A HIS 164 A MET 165 A GLU 166 A LEU 167 A PRO 168 A ARG 188 A GLN 189 A THR 190 A GLN 192                                                                               | −9.22 |
| 65745-47-3  | A THR 24 A THR 25 A THR 26 A LEU 27 A HIS 41 A SER 46 A MET 49 A PHE 140 A LEU 141 A ASN 142 A GLY 143 A SER 144 A CYS 145 A HIS 163 A HIS 164 A MET 165 A GLU 166 A HIS 172 A GLN 189                                                    | −9.14 |
| 514830-04-7 | A THR 25 A LEU 27 A HIS 41 A MET 49 A PHE 140 A LEU 141 A ASN 142 A GLY 143 A SER 144 A CYS 145 A HIS 163 A HIS 164 A MET 165 A GLU 166 A PRO 168 A HIS 172 A ASP 187 A ARG 188 A GLN 189 A THR 190 A ALA 191                             | −9.14 |
| 113540-81-1 | A THR 25 A LEU 27 A HIS 41 A MET 49 A PHE 140 A LEU 141 A ASN 142 A GLY 143 A SER 144 A CYS 145 A HIS 163 A HIS 164 A MET 165 A GLU 166 A PRO 168 A HIS 172 A ASP 187 A ARG 188 A GLN 189 A THR 190 A ALA 191                             | −9.13 |
| 97888-14-7  | A HIS 41 A CYS 44 A MET 49 A PRO 52 A TYR 54 A PHE 140 A LEU 141 A ASN 142 A GLY 143 A SER 144 A CYS 145 A HIS 164 A MET 165 A GLU 166 A LEU 167 A PRO 168 A VAL 186 A ASP 187 A ARG 188 A GLN 189 A THR 190 A ALA 191 A GLN 192          | −9.00 |
| 144587-57-5 | A THR 25 A THR 26 A LEU 27 A HIS 41 A MET 49 A PHE 140 A LEU 141 A ASN 142 A GLY 143 A SER 144 A CYS 145 A HIS 163 A HIS 164 A MET 165 A GLU 166 A PRO 168 A GLN 189 A THR 190 A ALA 191                                                  | −8.94 |

|             |                                                                                                                                                                                                                                                          |       |
|-------------|----------------------------------------------------------------------------------------------------------------------------------------------------------------------------------------------------------------------------------------------------------|-------|
| 757976-67-3 | A THR 24 A THR 25 A THR 26 A LEU 27 A HIS 41 A CYS 44 A THR 45 A SER 46 A MET 49 A TYR 54 A ASN 142 A GLY 143 A CYS 145 A HIS 163 A HIS 164 A MET 165 A GLU 166 A ASP 187 A ARG 188 A GLN 189                                                            | −8.92 |
| 97948-90-8  | A HIS 41 A CYS 44 A MET 49 A PRO 52 A TYR 54 A PHE 140 A LEU 141 A ASN 142 A GLY 143 A SER 144 A CYS 145 A HIS 164 A MET 165 A GLU 166 A LEU 167 A PRO 168 A ASP 187 A ARG 188 A GLN 189 A THR 190 A GLN 192                                             | −8.91 |
| 89444-89-3  | A THR 25 A THR 26 A LEU 27 A HIS 41 A MET 49 A PHE 140 A LEU 141 A ASN 142 A SER 144 A CYS 145 A HIS 163 A HIS 164 A MET 165 A GLU 166 A PRO 168 A ASP 187 A ARG 188 A GLN 189 A THR 190 A GLN 192                                                       | −8.91 |
| 97888-13-6  | A HIS 41 A CYS 44 A MET 49 A PRO 52 A TYR 54 A PHE 140 A LEU 141 A ASN 142 A GLY 143 A SER 144 A CYS 145 A HIS 164 A MET 165 A GLU 166 A LEU 167 A PRO 168 A ASP 187 A ARG 188 A GLN 189 A THR 190 A GLN 192                                             | −8.91 |
| 131727-01-0 | A LEU 50 A PHE 140 A LEU 141 A ASN 142 A HIS 163 A MET 165 A GLU 166 A LEU 167 A PRO 168 A HIS 172 A ARG 188 A GLN 189 A THR 190 A ALA 191 A GLN 192                                                                                                     | −8.87 |
| 175669-27-9 | A HIS 41 A MET 49 A TYR 54 A PHE 140 A LEU 141 A ASN 142 A GLY 143 A CYS 145 A HIS 163 A HIS 164 A MET 165 A GLU 166 A LEU 167 A PRO 168 A HIS 172 A ASP 187 A ARG 188 A GLN 189 A THR 190 A ALA 191                                                     | −8.85 |
| 24577-34-8  | A HIS 41 A CYS 44 A MET 49 A PRO 52 A TYR 54 A PHE 140 A LEU 141 A ASN 142 A CYS 145 A HIS 164 A MET 165 A GLU 166 A LEU 167 A PRO 168 A THR 169 A GLY 170 A ASP 187 A ARG 188 A GLN 189 A THR 190 A ALA 191 A GLN 192                                   | −8.84 |
| 194427-76-4 | A THR 25 A THR 26 A LEU 27 A HIS 41 A MET 49 A PHE 140 A LEU 141 A ASN 142 A GLY 143 A SER 144 A CYS 145 A HIS 163 A HIS 164 A MET 165 A GLU 166 A PRO 168 A HIS 172 A GLN 189 A THR 190 A ALA 191                                                       | −8.84 |
| 144027-78-1 | A THR 25 A THR 26 A LEU 27 A HIS 41 A MET 49 A TYR 54 A ASN 142 A GLY 143 A SER 144 A CYS 145 A HIS 164 A MET 165 A GLU 166 A LEU 167 A PRO 168 A ASP 187 A ARG 188 A GLN 189 A THR 190 A ALA 191 A GLN 192                                              | −8.82 |
| 133056-07-2 | A THR 25 A THR 26 A LEU 27 A HIS 41 A VAL 42 A MET 49 A LEU 141 A ASN 142 A GLY 143 A SER 144 A CYS 145 A HIS 163 A HIS 164 A MET 165 A GLU 166 A PRO 168 A HIS 172 A ARG 188 A GLN 189 A THR 190 A ALA 191 A GLN 192                                    | −8.81 |
| 105239-70-1 | A THR 24 A THR 25 A THR 26 A LEU 27 A HIS 41 A CYS 44 A THR 45 A SER 46 A MET 49 A PRO 52 A TYR 54 A LEU 141 A ASN 142 A GLY 143 A SER 144 A CYS 145 A HIS 163 A HIS 164 A MET 165 A GLU 166 A LEU 167 A PRO 168 A HIS 172 A ASP 187 A ARG 188 A GLN 189 | −8.81 |
| 345642-84-4 | A THR 25 A THR 26 A LEU 27 A HIS 41 A MET 49 A PHE 140 A LEU 141 A ASN 142 A GLY 143 A SER 144 A CYS 145 A HIS 163 A MET 165 A GLU 166 A LEU 167 A PRO 168 A ARG 188 A GLN 189 A THR 190 A GLN 192                                                       | −8.80 |
| 52645-09-7  | A THR 25 A THR 26 A LEU 27 A HIS 41 A MET 49 A PHE 140 A LEU 141 A ASN 142 A GLY 143 A SER 144 A CYS 145 A HIS 163 A MET 165 A GLU 166 A LEU 167 A PRO 168 A ARG 188 A GLN 189 A THR 190 A GLN 192                                                       | −8.79 |

|             |                                                                                                                                                                                                                                                          |       |
|-------------|----------------------------------------------------------------------------------------------------------------------------------------------------------------------------------------------------------------------------------------------------------|-------|
| 105815-90-5 | A HIS 41 A PHE 140 A LEU 141 A ASN 142 A GLY 143 A SER 144 A CYS 145 A HIS 163 A HIS 164 A MET 165 A GLU 166 A PRO 168 A HIS 172 A VAL 186 A ASP 187 A ARG 188 A GLN 189 A THR 190                                                                       | −8.73 |
| 17991-67-2  | A THR 24 A THR 25 A THR 26 A LEU 27 A MET 49 A PHE 140 A LEU 141 A ASN 142 A GLY 143 A SER 144 A CYS 145 A HIS 163 A HIS 164 A MET 165 A GLU 166 A HIS 172 A GLN 189                                                                                     | −8.72 |
| 224577-31-5 | A HIS 41 A CYS 44 A MET 49 A PRO 52 A TYR 54 A PHE 140 A LEU 141 A ASN 142 A GLY 143 A CYS 145 A HIS 163 A HIS 164 A MET 165 A GLU 166 A LEU 167 A PRO 168 A THR 169 A GLY 170 A ASP 187 A ARG 188 A GLN 189 A THR 190 A ALA 191 A GLN 192               | −8.72 |
| 224577-33-7 | A HIS 41 A CYS 44 A MET 49 A PRO 52 A TYR 54 A PHE 140 A LEU 141 A ASN 142 A GLY 143 A CYS 145 A HIS 163 A HIS 164 A MET 165 A GLU 166 A LEU 167 A PRO 168 A THR 169 A GLY 170 A ASP 187 A ARG 188 A GLN 189 A THR 190 A ALA 191 A GLN 192               | −8.72 |
| 50335-04-1  | A HIS 41 A MET 49 A PHE 140 A LEU 141 A ASN 142 A SER 144 A CYS 145 A HIS 163 A HIS 164 A MET 165 A GLU 166 A HIS 172 A VAL 186 A ASP 187 A ARG 188 A GLN 189 A THR 190 A GLN 192                                                                        | −8.71 |
| 445430-65-9 | A THR 24 A THR 25 A THR 26 A LEU 27 A HIS 41 A MET 49 A TYR 118 A ASN 119 A PHE 140 A LEU 141 A ASN 142 A GLY 143 A SER 144 A CYS 145 A HIS 163 A HIS 164 A MET 165 A GLU 166 A LEU 167 A PRO 168 A ASP 187 A ARG 188 A GLN 189 A THR 190 A GLN 192      | −8.68 |
| 935841-71-7 | A THR 25 A HIS 41 A MET 49 A PHE 140 A LEU 141 A ASN 142 A GLY 143 A SER 144 A CYS 145 A HIS 163 A HIS 164 A MET 165 A GLU 166 A LEU 167 A PRO 168 A HIS 172 A ASP 187 A ARG 188 A GLN 189 A THR 190 A ALA 191 A GLN 192                                 | −8.66 |
| 136024-80-1 | A THR 24 A THR 25 A THR 26 A HIS 41 A MET 49 A PHE 140 A LEU 141 A ASN 142 A GLY 143 A SER 144 A CYS 145 A HIS 163 A HIS 164 A MET 165 A GLU 166 A HIS 172 A ARG 188 A GLN 189                                                                           | −8.62 |
| 852872-93-6 | A THR 25 A THR 26 A LEU 27 A HIS 41 A VAL 42 A MET 49 A PHE 140 A LEU 141 A ASN 142 A GLY 143 A SER 144 A CYS 145 A HIS 163 A HIS 164 A MET 165 A GLU 166 A LEU 167 A PRO 168 A GLY 170 A ASP 187 A ARG 188 A GLN 189 A THR 190 A ALA 191 A GLN 192      | −8.61 |
| 104758-18-1 | A SER 46 A GLU 47 A MET 49 A LEU 50 A PHE 140 A LEU 141 A ASN 142 A SER 144 A CYS 145 A HIS 163 A HIS 164 A MET 165 A GLU 166 A LEU 167 A PRO 168 A HIS 172 A ARG 188 A GLN 189 A THR 190 A ALA 191 A GLN 192                                            | −8.58 |
| 97915-31-6  | A THR 24 A THR 25 A THR 26 A LEU 27 A HIS 41 A THR 45 A MET 49 A PHE 140 A LEU 141 A ASN 142 A GLY 143 A SER 144 A CYS 145 A HIS 163 A HIS 164 A MET 165 A GLU 166 A LEU 167 A PRO 168 A GLY 170 A HIS 172 A VAL 186 A ARG 188 A GLN 189 A THR 190 A ALA | −8.58 |
| 35906-51-5  | A SER 46 A GLU 47 A MET 49 A LEU 50 A PHE 140 A LEU 141 A ASN 142 A SER 144 A CYS 145 A HIS 163 A HIS 164 A MET 165 A GLU 166 A LEU 167 A PRO 168 A HIS 172 A ARG 188 A GLN 189 A THR 190 A ALA 191 A GLN 192                                            | −8.57 |



|             |                                                                                                                                                                                                                                                          |       |
|-------------|----------------------------------------------------------------------------------------------------------------------------------------------------------------------------------------------------------------------------------------------------------|-------|
| 208927-15-5 | A THR 24 A THR 25 A THR 26 A LEU 27 A HIS 41 A MET 49 A PHE 140 A LEU 141 A ASN 142 A GLY 143 A SER 144 A CYS 145 A HIS 163 A HIS 164 A MET 165 A GLU 166 A LEU 167 A PRO 168 A HIS 172 A GLN 189 A THR 190 A ALA 191 A GLN 192                          | −8.56 |
| 55544-35-9  | A THR 25 A THR 26 A LEU 27 A HIS 41 A MET 49 A LEU 141 A ASN 142 A GLY 143 A SER 144 A CYS 145 A HIS 163 A MET 165 A GLU 166 A LEU 167 A PRO 168 A ARG 188 A GLN 189 A THR 190 A ALA 191 A GLN 192                                                       | −8.56 |
| 194234-73-6 | A THR 24 A THR 25 A THR 26 A LEU 27 A HIS 41 A MET 49 A PHE 140 A LEU 141 A ASN 142 A GLY 143 A SER 144 A CYS 145 A HIS 163 A HIS 164 A MET 165 A GLU 166 A LEU 167 A HIS 172 A VAL 186 A ASP 187 A ARG 188 A GLN 189                                    | −8.56 |
| 104759-19-5 | A SER 46 A GLU 47 A MET 49 A LEU 50 A PHE 140 A LEU 141 A ASN 142 A SER 144 A CYS 145 A HIS 163 A HIS 164 A MET 165 A GLU 166 A LEU 167 A PRO 168 A HIS 172 A ARG 188 A GLN 189 A THR 190 A ALA 191 A GLN 192                                            | −8.55 |
| 133613-77-1 | A LEU 27 A HIS 41 A MET 49 A PHE 140 A LEU 141 A ASN 142 A GLY 143 A SER 144 A CYS 145 A HIS 163 A HIS 164 A MET 165 A GLU 166 A LEU 167 A PRO 168 A ARG 188 A GLN 189 A THR 190 A ALA 191 A GLN 192                                                     | −8.55 |
| 273410-51-8 | A THR 24 A THR 25 A THR 26 A LEU 27 A HIS 41 A MET 49 A PHE 140 A LEU 141 A ASN 142 A GLY 143 A SER 144 A CYS 145 A HIS 163 A HIS 164 A MET 165 A GLU 166 A LEU 167 A VAL 186 A ASP 187 A ARG 188 A GLN 189                                              | −8.54 |
| 115982-32-6 | A THR 24 A THR 25 A THR 26 A HIS 41 A SER 46 A MET 49 A PHE 140 A LEU 141 A ASN 142 A GLY 143 A SER 144 A CYS 145 A HIS 163 A HIS 164 A MET 165 A GLU 166 A HIS 172 A VAL 186 A ASP 187 A ARG 188 A GLN 189                                              | −8.50 |
| 81657-79-6  | A THR 24 A THR 25 A THR 26 A LEU 27 A HIS 41 A SER 46 A MET 49 A TYR 54 A LEU 141 A ASN 142 A GLY 143 A SER 144 A CYS 145 A HIS 163 A HIS 164 A MET 165 A GLU 166 A VAL 186 A ASP 187 A ARG 188 A GLN 189 A GLN 192                                      | −8.50 |
| 36119-03-6  | A THR 25 A THR 26 A LEU 27 A HIS 41 A CYS 44 A MET 49 A PRO 52 A TYR 54 A PHE 140 A LEU 141 A ASN 142 A GLY 143 A SER 144 A CYS 145 A HIS 163 A HIS 164 A MET 165 A GLU 166 A PRO 168 A HIS 172 A ASP 187 A ARG 188 A GLN 189 A THR 190 A GLN 192        | −8.47 |
| 83481-23-6  | A MET 49 A PHE 140 A LEU 141 A ASN 142 A GLY 143 A SER 144 A CYS 145 A HIS 163 A HIS 164 A MET 165 A GLU 166 A LEU 167 A PRO 168 A HIS 172 A ARG 188 A GLN 189 A THR 190 A ALA 191 A GLN 192                                                             | −8.47 |
| 80680-43-9  | A HIS 41 A MET 49 A TYR 54 A ASN 142 A CYS 145 A HIS 163 A HIS 164 A MET 165 A GLU 166 A LEU 167 A PRO 168 A ASP 187 A ARG 188 A GLN 189 A THR 190 A ALA 191                                                                                             | −8.47 |
| 18097-67-1  | A THR 25 A THR 26 A LEU 27 A HIS 41 A CYS 44 A MET 49 A PRO 52 A TYR 54 A PHE 140 A LEU 141 A ASN 142 A GLY 143 A SER 144 A CYS 145 A HIS 163 A HIS 164 A MET 165 A GLU 166 A LEU 167 A PRO 168 A ASP 187 A ARG 188 A GLN 189                            | −8.46 |
| 138529-07-4 | A THR 24 A THR 25 A THR 26 A LEU 27 A HIS 41 A CYS 44 A THR 45 A SER 46 A GLU 47 A ASP 48 A MET 49 A LEU 50 A TYR 54 A ASN 142 A GLY 143 A CYS 145 A HIS 163 A HIS 164 A MET 165 A GLU 166 A PRO 168 A ASP 187 A ARG 188 A GLN 189 A THR 190 A ALA 191 A | −8.45 |

|             |                                                                                                                                                                                                                                                                    |       |
|-------------|--------------------------------------------------------------------------------------------------------------------------------------------------------------------------------------------------------------------------------------------------------------------|-------|
| 61369-27-5  | A THR 24 A THR 25 A THR 26 A HIS 41 A CYS 44 A THR 45 A SER 46 A MET 49 A TYR 54<br>A ASN 142 A GLY 143 A CYS 145 A HIS 164 A MET 165 A GLU 166 A PRO 168 A ASP 187<br>A ARG 188 A GLN 189 A THR 190 A ALA 191                                                     | −8.45 |
| 70022-71-8  | A THR 25 A LEU 27 A HIS 41 A MET 49 A LEU 141 A ASN 142 A GLY 143 A SER 144 A<br>CYS 145 A HIS 163 A HIS 164 A MET 165 A GLU 166 A LEU 167 A PRO 168 A ARG 188 A<br>GLN 189 A THR 190 A ALA 191 A GLN 192                                                          | −8.45 |
| 55482-27-4  | A THR 24 A THR 25 A THR 26 A HIS 41 A CYS 44 A THR 45 A SER 46 A MET 49 A PRO 52<br>A TYR 54 A PHE 140 A LEU 141 A ASN 142 A GLY 143 A SER 144 A CYS 145 A HIS 163 A<br>HIS 164 A MET 165 A GLU 166 A LEU 167 A PRO 168 A ASP 187 A ARG 188 A GLN 189 A<br>THR 190 | −8.44 |
| 138529-05-2 | A THR 24 A THR 25 A THR 26 A LEU 27 A HIS 41 A CYS 44 A THR 45 A SER 46 A MET 49<br>A ASN 142 A GLY 143 A CYS 145 A HIS 164 A MET 165 A GLU 166 A LEU 167 A PRO 168<br>A VAL 186 A ASP 187 A ARG 188 A GLN 189 A THR 190 A GLN 192                                 | −8.40 |
| 690627-61-3 | A THR 24 A THR 25 A THR 26 A LEU 27 A HIS 41 A MET 49 A PHE 140 A LEU 141 A ASN<br>142 A GLY 143 A SER 144 A CYS 145 A HIS 163 A HIS 164 A MET 165 A GLU 166 A LEU<br>167 A PRO 168 A HIS 172 A ARG 188 A GLN 189 A THR 190 A ALA 191 A GLN 192                    | −8.40 |
| 213547-25-2 | A THR 24 A THR 25 A THR 26 A LEU 27 A HIS 41 A THR 45 A SER 46 A MET 49 A PHE 140<br>A LEU 141 A ASN 142 A GLY 143 A SER 144 A CYS 145 A HIS 163 A HIS 164 A MET 165 A<br>GLU 166 A HIS 172 A GLN 189                                                              | −8.40 |
| 52796-14-2  | A THR 25 A LEU 27 A HIS 41 A MET 49 A PHE 140 A LEU 141 A ASN 142 A GLY 143 A<br>SER 144 A CYS 145 A HIS 163 A HIS 164 A MET 165 A GLU 166 A LEU 167 A PRO 168 A<br>HIS 172 A ARG 188 A GLN 189 A THR 190 A ALA 191 A GLN 192                                      | −8.38 |
| 207385-07-7 | A THR 25 A LEU 27 A HIS 41 A MET 49 A PHE 140 A LEU 141 A ASN 142 A GLY 143 A<br>SER 144 A CYS 145 A HIS 163 A HIS 164 A MET 165 A GLU 166 A LEU 167 A PRO 168 A<br>HIS 172 A ARG 188 A GLN 189 A THR 190 A ALA 191 A GLN 192                                      | −8.38 |
| 102506-55-8 | A THR 24 A THR 25 A THR 26 A LEU 27 A HIS 41 A CYS 44 A THR 45 A SER 46 A MET 49<br>A LEU 141 A ASN 142 A GLY 143 A SER 144 A CYS 145 A MET 165 A GLU 166 A LEU 167<br>A PRO 168 A ARG 188 A GLN 189 A THR 190 A GLN 192                                           | −8.38 |
| 188558-97-6 | A THR 24 A THR 25 A THR 26 A HIS 41 A MET 49 A ASN 142 A GLY 143 A CYS 145 A HIS<br>164 A MET 165 A GLU 166 A LEU 167 A PRO 168 A ASP 187 A ARG 188 A GLN 189 A THR<br>190 A ALA 191 A GLN 192                                                                     | −8.36 |
| 256649-68-0 | A MET 49 A PHE 140 A LEU 141 A ASN 142 A GLY 143 A SER 144 A CYS 145 A HIS 163 A<br>HIS 164 A MET 165 A GLU 166 A LEU 167 A PRO 168 A HIS 172 A ARG 188 A GLN 189 A<br>THR 190 A GLN 192                                                                           | −8.36 |
| 55945-74-9  | A HIS 41 A MET 49 A PHE 140 A LEU 141 A ASN 142 A GLY 143 A SER 144 A CYS 145 A<br>HIS 163 A HIS 164 A MET 165 A GLU 166 A LEU 167 A PRO 168 A GLN 189 A THR 190 A<br>ALA 191                                                                                      | −8.34 |
| 65773-98-0  | A THR 25 A THR 26 A LEU 27 A HIS 41 A MET 49 A PHE 140 A LEU 141 A ASN 142 A GLY<br>143 A SER 144 A CYS 145 A HIS 163 A HIS 164 A MET 165 A GLU 166 A LEU 167 A PRO<br>168 A HIS 172 A GLN 189                                                                     | −8.34 |

|             |                                                                                                                                                                                                                                                                   |       |
|-------------|-------------------------------------------------------------------------------------------------------------------------------------------------------------------------------------------------------------------------------------------------------------------|-------|
| 137809-94-0 | A THR 24 A THR 25 A THR 26 A LEU 27 A HIS 41 A CYS 44 A MET 49 A LEU 50 A TYR 54<br>A PHE 140 A LEU 141 A ASN 142 A GLY 143 A SER 144 A CYS 145 A HIS 164 A MET 165<br>A GLU 166 A LEU 167 A PRO 168 A GLY 170 A ASP 187 A ARG 188 A GLN 189 A THR 190<br>A GLN 1 | −8.33 |
| 137844-97-4 | A THR 24 A THR 25 A THR 26 A LEU 27 A THR 45 A SER 46 A MET 49 A PHE 140 A LEU<br>141 A ASN 142 A GLY 143 A SER 144 A CYS 145 A HIS 163 A HIS 164 A MET 165 A GLU<br>166 A LEU 167 A PRO 168 A HIS 172 A ARG 188 A GLN 189 A THR 190 A GLN 192                    | −8.32 |
| 36011-19-5  | A THR 24 A THR 25 A THR 26 A LEU 27 A HIS 41 A VAL 42 A CYS 44 A THR 45 A SER 46<br>A MET 49 A PHE 140 A LEU 141 A ASN 142 A GLY 143 A SER 144 A CYS 145 A HIS 163 A<br>HIS 164 A MET 165 A GLU 166 A HIS 172 A GLN 189                                           | −8.30 |
| 54854-92-1  | A THR 25 A THR 26 A LEU 27 A HIS 41 A MET 49 A PHE 140 A LEU 141 A ASN 142 A GLY<br>143 A SER 144 A CYS 145 A HIS 163 A HIS 164 A MET 165 A GLU 166 A LEU 167 A PRO<br>168 A HIS 172 A ARG 188 A GLN 189 A THR 190 A GLN 192                                      | −8.29 |
| 656250-28-1 | A THR 24 A THR 25 A THR 26 A HIS 41 A CYS 44 A THR 45 A SER 46 A MET 49 A PHE 140<br>A LEU 141 A ASN 142 A GLY 143 A SER 144 A CYS 145 A HIS 163 A HIS 164 A MET 165 A<br>GLU 166 A HIS 172 A GLN 189                                                             | −8.29 |
| 798575-31-2 | A THR 24 A THR 25 A THR 26 A HIS 41 A CYS 44 A THR 45 A SER 46 A MET 49 A PHE 140<br>A LEU 141 A ASN 142 A GLY 143 A SER 144 A CYS 145 A HIS 163 A HIS 164 A MET 165 A<br>GLU 166 A HIS 172 A GLN 189                                                             | −8.29 |
| 128129-56-6 | A THR 25 A THR 26 A LEU 27 A HIS 41 A MET 49 A ASN 142 A GLY 143 A CYS 145 A MET<br>165 A GLU 166 A VAL 186 A ASP 187 A ARG 188 A GLN 189 A THR 190 A GLN 192                                                                                                     | −8.28 |
| 144587-58-6 | A THR 25 A THR 26 A LEU 27 A HIS 41 A MET 49 A ASN 142 A GLY 143 A CYS 145 A MET<br>165 A GLU 166 A LEU 167 A PRO 168 A GLN 189 A THR 190 A ALA 191 A GLN 192                                                                                                     | −8.27 |
| 72380-13-3  | A THR 25 A THR 26 A LEU 27 A HIS 41 A VAL 42 A MET 49 A PHE 140 A LEU 141 A ASN<br>142 A GLY 143 A SER 144 A CYS 145 A HIS 163 A MET 165 A GLU 166 A LEU 167 A PRO<br>168 A ARG 188 A GLN 189 A THR 190 A GLN 192                                                 | −8.24 |
| 83903-60-0  | A THR 25 A THR 26 A CYS 44 A THR 45 A SER 46 A MET 49 A PHE 140 A LEU 141 A ASN<br>142 A SER 144 A CYS 145 A HIS 163 A HIS 164 A MET 165 A GLU 166 A LEU 167 A PRO<br>168 A HIS 172 A ARG 188 A GLN 189 A THR 190 A ALA 191 A GLN 192                             | −8.23 |
| 50611-86-4  | A HIS 41 A CYS 44 A MET 49 A PRO 52 A TYR 54 A PHE 140 A LEU 141 A ASN 142 A SER<br>144 A CYS 145 A HIS 163 A HIS 164 A MET 165 A GLU 166 A HIS 172 A ASP 187 A ARG<br>188 A GLN 189                                                                              | −8.23 |
| 164176-22-1 | A THR 24 A THR 25 A LEU 27 A HIS 41 A CYS 44 A THR 45 A SER 46 A MET 49 A PRO 52<br>A TYR 54 A ASN 142 A GLY 143 A CYS 145 A HIS 164 A MET 165 A GLU 166 A PHE 181<br>A ASP 187 A ARG 188 A GLN 189                                                               | −8.23 |
| 164176-24-3 | A THR 24 A THR 25 A THR 26 A HIS 41 A CYS 44 A THR 45 A SER 46 A MET 49 A PRO 52<br>A TYR 54 A ASN 119 A ASN 142 A GLY 143 A CYS 145 A HIS 164 A MET 165 A GLU 166<br>A ASP 187 A ARG 188 A GLN 189                                                               | −8.21 |
| 70938-59-9  | A HIS 41 A MET 49 A PHE 140 A LEU 141 A ASN 142 A GLY 143 A SER 144 A CYS 145 A<br>HIS 163 A HIS 164 A MET 165 A GLU 166 A LEU 167 A PRO 168 A HIS 172 A ASP 187 A<br>ARG 188 A GLN 189 A THR 190 A ALA 191 A GLN 192                                             | −8.21 |

|             |                                                                                                                                                                                                                                                           |       |
|-------------|-----------------------------------------------------------------------------------------------------------------------------------------------------------------------------------------------------------------------------------------------------------|-------|
| 114-25-0    | THR 24 A THR 25 A THR 26 A HIS 41 A CYS 44 A THR 45 A SER 46 A MET 49 A PRO 52 A TYR 54 A PHE 140 A LEU 141 A ASN 142 A GLY 143 A SER 144 A CYS 145 A HIS 163 A HIS 164 A MET 165 A GLU 166 A LEU 167 A PRO 168 A ASP 187 A ARG 188 A GLN 189 A THR 190 A | −8.21 |
| 174630-08-1 | A THR 24 A THR 25 A THR 26 A LEU 27 A HIS 41 A CYS 44 A THR 45 A SER 46 A MET 49 A LEU 141 A ASN 142 A GLY 143 A SER 144 A CYS 145 A HIS 163 A HIS 164 A MET 165 A GLU 166 A LEU 167 A PRO 168 A ARG 188 A GLN 189 A THR 190 A ALA 191 A GLN 192          | −8.21 |
| 72509-61-6  | A THR 25 A THR 26 A MET 49 A PHE 140 A LEU 141 A ASN 142 A GLY 143 A SER 144 A CYS 145 A HIS 163 A HIS 164 A MET 165 A GLU 166 A LEU 167 A PRO 168 A ARG 188 A GLN 189                                                                                    | −8.20 |
| 184348-39-8 | A THR 25 A THR 26 A HIS 41 A MET 49 A TYR 118 A ASN 119 A ASN 142 A GLY 143 A CYS 145 A HIS 164 A MET 165 A GLU 166 A GLN 189                                                                                                                             | −8.19 |
| 137809-89-3 | A THR 24 A THR 25 A LEU 27 A HIS 41 A CYS 44 A THR 45 A SER 46 A MET 49 A TYR 54 A PHE 140 A ASN 142 A GLY 143 A CYS 145 A HIS 163 A HIS 164 A MET 165 A GLU 166 A HIS 172 A ASP 187 A ARG 188 A GLN 189                                                  | −8.17 |
| 111036-40-9 | A LEU 27 A HIS 41 A MET 49 A PHE 140 A LEU 141 A ASN 142 A GLY 143 A SER 144 A CYS 145 A HIS 163 A HIS 164 A MET 165 A GLU 166 A LEU 167 A PRO 168 A HIS 172 A ASP 187 A ARG 188 A GLN 189 A THR 190 A ALA 191 A GLN 192                                  | −8.15 |
| 164176-23-2 | A THR 24 A THR 25 A THR 26 A HIS 41 A CYS 44 A SER 46 A MET 49 A PRO 52 A TYR 54 A ASN 119 A ASN 142 A GLY 143 A SER 144 A CYS 145 A HIS 164 A MET 165 A GLU 166 A PHE 181 A ASP 187 A ARG 188 A GLN 189                                                  | −8.15 |
| 137824-59-0 | A HIS 41 A CYS 44 A MET 49 A PRO 52 A TYR 54 A PHE 140 A LEU 141 A ASN 142 A GLY 143 A SER 144 A CYS 145 A HIS 163 A HIS 164 A MET 165 A GLU 166 A LEU 167 A PRO 168 A HIS 172 A ASP 187 A ARG 188 A GLN 189 A THR 190 A ALA 191 A GLN 192                | −8.15 |
| 76689-96-8  | A THR 24 A THR 25 A LEU 27 A HIS 41 A CYS 44 A THR 45 A SER 46 A MET 49 A PRO 52 A TYR 54 A ASN 142 A GLY 143 A CYS 145 A HIS 164 A MET 165 A GLU 166 A PHE 181 A ASP 187 A ARG 188 A GLN 189                                                             | −8.15 |
| 142925-51-7 | A HIS 41 A CYS 44 A MET 49 A PRO 52 A TYR 54 A PHE 140 A LEU 141 A ASN 142 A SER 144 A CYS 145 A HIS 163 A HIS 164 A MET 165 A GLU 166 A LEU 167 A PRO 168 A THR 169 A GLY 170 A HIS 172 A ASP 187 A ARG 188 A GLN 189 A THR 190 A ALA 191 A GLN 192      | −8.14 |
| 172854-77-2 | A MET 49 A PHE 140 A LEU 141 A ASN 142 A GLY 143 A SER 144 A CYS 145 A HIS 163 A HIS 164 A MET 165 A GLU 166 A LEU 167 A PRO 168 A HIS 172 A ARG 188 A GLN 189 A THR 190 A GLN 192                                                                        | −8.14 |
| 329050-25-1 | A THR 24 A THR 25 A THR 26 A LEU 27 A HIS 41 A VAL 42 A MET 49 A TYR 54 A ASN 142 A GLY 143 A CYS 145 A HIS 163 A HIS 164 A MET 165 A GLU 166 A PHE 181 A ASP 187 A ARG 188 A GLN 189                                                                     | −8.10 |
| 137809-88-2 | A HIS 41 A CYS 44 A MET 49 A TYR 54 A PHE 140 A LEU 141 A ASN 142 A GLY 143 A SER 144 A CYS 145 A HIS 163 A MET 165 A GLU 166 A PRO 168 A HIS 172 A VAL 186 A ASP 187 A ARG 188 A GLN 189 A THR 190 A GLN 192                                             | −8.09 |

|             |                                                                                                                                                                                                                               |       |
|-------------|-------------------------------------------------------------------------------------------------------------------------------------------------------------------------------------------------------------------------------|-------|
| 86425-61-8  | A THR 24 A THR 25 A THR 26 A LEU 27 A HIS 41 A VAL 42 A SER 46 A MET 49 A ASN 119 A PHE 140 A LEU 141 A ASN 142 A GLY 143 A SER 144 A CYS 145 A HIS 163 A HIS 164 A MET 165 A GLU 166 A HIS 172 A ASP 187 A ARG 188 A GLN 189 | −8.06 |
| 823808-55-5 | A THR 25 A LEU 27 A HIS 41 A MET 49 A ASN 142 A GLY 143 A SER 144 A CYS 145 A HIS 163 A HIS 164 A MET 165 A GLU 166 A LEU 167 A PRO 168 A HIS 172 A ARG 188 A GLN 189 A THR 190 A ALA 191 A GLN 192                           | −8.06 |
| 145613-82-7 | A LEU 27 A HIS 41 A MET 49 A PHE 140 A LEU 141 A ASN 142 A GLY 143 A SER 144 A CYS 145 A HIS 163 A HIS 164 A MET 165 A GLU 166 A LEU 167 A PRO 168 A HIS 172 A ASP 187 A ARG 188 A GLN 189 A THR 190 A ALA 191 A GLN 192      | −8.05 |
| 858950-52-4 | A THR 25 A THR 26 A LEU 27 A HIS 41 A MET 49 A ASN 142 A GLY 143 A SER 144 A CYS 145 A HIS 163 A HIS 164 A MET 165 A GLU 166 A PRO 168 A GLN 189                                                                              | −8.05 |
| 80442-78-0  | A MET 49 A LEU 141 A ASN 142 A GLY 143 A SER 144 A CYS 145 A HIS 163 A HIS 164 A MET 165 A GLU 166 A LEU 167 A PRO 168 A GLN 189 A THR 190                                                                                    | −8.04 |
| 80442-79-1  | A MET 49 A LEU 141 A ASN 142 A GLY 143 A SER 144 A CYS 145 A HIS 163 A HIS 164 A MET 165 A GLU 166 A LEU 167 A PRO 168 A GLN 189 A THR 190                                                                                    | −8.04 |
| 115268-43-4 | A HIS 41 A MET 49 A LEU 141 A ASN 142 A CYS 145 A HIS 163 A HIS 164 A MET 165 A GLU 166 A LEU 167 A PRO 168 A ARG 188 A GLN 189                                                                                               | −8.04 |
| 364344-14-9 | A THR 24 A THR 25 A THR 26 A LEU 27 A HIS 41 A MET 49 A LEU 141 A ASN 142 A GLY 143 A SER 144 A CYS 145 A HIS 163 A HIS 164 A MET 165 A GLU 166 A LEU 167 A PRO 168 A ARG 188 A GLN 189 A THR 190 A GLN 192                   | −8.04 |
| 105404-85-1 | A THR 24 A THR 25 A THR 26 A HIS 41 A CYS 44 A THR 45 A SER 46 A MET 49 A LEU 141 A ASN 142 A GLY 143 A SER 144 A CYS 145 A HIS 163 A HIS 164 A MET 165 A GLU 166 A LEU 167 A PRO 168 A ARG 188 A GLN 189 A THR 190           | −8.04 |
| 137824-58-9 | A THR 25 A THR 26 A LEU 27 A MET 49 A PHE 140 A LEU 141 A ASN 142 A GLY 143 A SER 144 A CYS 145 A HIS 163 A HIS 164 A MET 165 A GLU 166 A PRO 168 A HIS 172 A ARG 188 A GLN 189 A THR 190 A ALA 191 A GLN 192                 | −8.04 |
| 99102-40-6  | A THR 24 A THR 25 A THR 26 A LEU 27 A HIS 41 A VAL 42 A THR 45 A SER 46 A MET 49 A TYR 118 A ASN 142 A GLY 143 A CYS 145 A MET 165 A GLU 166 A GLN 189                                                                        | −8.02 |
| 100244-36-8 | A THR 24 A THR 25 A THR 26 A LEU 27 A HIS 41 A MET 49 A LEU 141 A ASN 142 A GLY 143 A SER 144 A CYS 145 A HIS 163 A HIS 164 A MET 165 A GLU 166 A GLN 189                                                                     | −8.02 |
| 157207-91-5 | A MET 49 A PHE 140 A LEU 141 A ASN 142 A GLY 143 A SER 144 A CYS 145 A HIS 163 A HIS 164 A MET 165 A GLU 166 A LEU 167 A PRO 168 A HIS 172 A ASP 187 A ARG 188 A GLN 189 A THR 190 A ALA 191                                  | −8.02 |
| 329197-89-9 | A THR 24 A THR 25 A THR 26 A LEU 27 A HIS 41 A MET 49 A LEU 141 A ASN 142 A GLY 143 A SER 144 A CYS 145 A HIS 163 A HIS 164 A MET 165 A GLU 166 A GLN 189                                                                     | −8.01 |
| 2643-02-9   | THR 24 A THR 25 A THR 26 A LEU 27 A HIS 41 A THR 45 A SER 46 A MET 49 A LEU 141 A ASN 142 A GLY 143 A SER 144 A CYS 145 A HIS 163 A HIS 164 A MET 165 A GLU 166 A ARG 188 A GLN 189 A GLN 192                                 | −8.01 |
| 143346-97-8 | A HIS 41 A MET 49 A PHE 140 A LEU 141 A ASN 142 A GLY 143 A SER 144 A CYS 145 A HIS 164 A MET 165 A GLU 166 A LEU 167 A PRO 168 A ARG 188 A GLN 189 A THR 190 A ALA 191 A GLN 192                                             | −8.01 |

|             |                                                                                                                                                                                                                                           |       |
|-------------|-------------------------------------------------------------------------------------------------------------------------------------------------------------------------------------------------------------------------------------------|-------|
| 149764-33-0 | A HIS 41 A MET 49 A LEU 50 A PHE 140 A LEU 141 A ASN 142 A GLY 143 A SER 144 A CYS 145 A HIS 163 A HIS 164 A MET 165 A GLU 166 A LEU 167 A PRO 168 A HIS 172 A GLN 189 A THR 190 A ALA 191 A GLN 192                                      | −8.00 |
| 143113-32-0 | A THR 24 A THR 25 A THR 26 A LEU 27 A HIS 41 A THR 45 A SER 46 A MET 49 A PHE 140 A LEU 141 A ASN 142 A GLY 143 A SER 144 A CYS 145 A HIS 163 A HIS 164 A MET 165 A GLU 166 A LEU 167 A PRO 168 A GLY 170 A HIS 172 A GLN 189             | −7.99 |
| 77658-95-8  | A THR 24 A THR 25 A THR 26 A LEU 27 A HIS 41 A CYS 44 A MET 49 A TYR 54 A PHE 140 A LEU 141 A ASN 142 A GLY 143 A SER 144 A CYS 145 A HIS 163 A HIS 164 A MET 165 A GLU 166 A HIS 172 A ASP 187 A ARG 188 A GLN 189                       | −7.99 |
| 858950-36-4 | A PHE 140 A LEU 141 A ASN 142 A GLY 143 A SER 144 A CYS 145 A HIS 163 A HIS 164 A MET 165 A GLU 166 A PRO 168 A HIS 172 A GLN 189 A THR 190 A ALA 191 A GLN 192                                                                           | −7.98 |
| 79206-71-6  | A THR 25 A HIS 41 A MET 49 A PHE 140 A LEU 141 A ASN 142 A GLY 143 A SER 144 A CYS 145 A HIS 163 A HIS 164 A MET 165 A GLU 166 A LEU 167 A PRO 168 A HIS 172 A ARG 188 A GLN 189 A THR 190 A ALA 191 A GLN 192                            | −7.98 |
| 724462-47-9 | A THR 25 A THR 26 A LEU 27 A HIS 41 A MET 49 A TYR 54 A PHE 140 A LEU 141 A ASN 142 A GLY 143 A SER 144 A CYS 145 A HIS 163 A HIS 164 A MET 165 A GLU 166 A HIS 172 A ASP 187 A ARG 188 A GLN 189                                         | −7.97 |
| 2122-98-7   | THR 25 A THR 26 A LEU 27 A HIS 41 A MET 49 A LEU 141 A ASN 142 A GLY 143 A SER 144 A CYS 145 A HIS 163 A HIS 164 A MET 165 A GLU 166 A HIS 172 A GLN 189 A THR 190                                                                        | −7.96 |
| 79067-75-7  | A THR 24 A THR 25 A THR 26 A LEU 27 A SER 46 A MET 49 A ASN 119 A PHE 140 A LEU 141 A ASN 142 A GLY 143 A SER 144 A CYS 145 A HIS 163 A GLU 166 A GLN 189                                                                                 | −7.92 |
| 603125-81-1 | A THR 25 A THR 26 A LEU 27 A HIS 41 A MET 49 A ASN 142 A GLY 143 A SER 144 A CYS 145 A HIS 164 A MET 165 A GLU 166 A PRO 168 A ARG 188 A GLN 189 A THR 190 A GLN 192                                                                      | −7.90 |
| 134985-04-9 | A HIS 41 A CYS 44 A MET 49 A LEU 50 A PRO 52 A TYR 54 A PHE 140 A LEU 141 A ASN 142 A GLY 143 A SER 144 A CYS 145 A HIS 163 A HIS 164 A MET 165 A GLU 166 A LEU 167 A PRO 168 A HIS 172 A ASP 187 A ARG 188 A GLN 189 A THR 190 A ALA 191 | −7.90 |
| 94513-77-6  | A THR 24 A THR 25 A THR 26 A LEU 27 A HIS 41 A CYS 44 A THR 45 A SER 46 A MET 49 A LEU 50 A TYR 54 A CYS 145 A HIS 164 A MET 165 A GLU 166 A LEU 167 A ASP 187 A ARG 188 A GLN 189 A THR 190 A ALA 191 A GLN 192                          | −7.90 |
| 92679-03-3  | A THR 24 A THR 25 A THR 26 A LEU 27 A HIS 41 A MET 49 A TYR 54 A ASN 142 A GLY 143 A CYS 145 A HIS 164 A MET 165 A GLU 166 A ASP 187 A ARG 188 A GLN 189                                                                                  | −7.89 |
| 65604-87-7  | A PHE 140 A LEU 141 A ASN 142 A GLY 143 A SER 144 A CYS 145 A HIS 163 A HIS 164 A MET 165 A GLU 166 A LEU 167 A PRO 168 A GLY 170 A HIS 172 A ASP 187 A ARG 188 A GLN 189 A THR 190 A GLN 192                                             | −7.89 |
| 304902-16-7 | A HIS 41 A MET 49 A PHE 140 A LEU 141 A ASN 142 A GLY 143 A SER 144 A CYS 145 A HIS 163 A HIS 164 A MET 165 A GLU 166 A LEU 167 A PRO 168 A ARG 188 A GLN 189 A THR 190 A ALA 191 A GLN 192                                               | −7.88 |



|             |                                                                                                                                                                                                                                                      |       |
|-------------|------------------------------------------------------------------------------------------------------------------------------------------------------------------------------------------------------------------------------------------------------|-------|
| 181034-78-6 | A HIS 41 A CYS 44 A MET 49 A PRO 52 A TYR 54 A ASN 142 A CYS 145 A HIS 164 A MET 165 A GLU 166 A LEU 167 A PRO 168 A GLY 170 A ASP 187 A ARG 188 A GLN 189 A THR 190 A ALA 191 A GLN 192                                                             | −7.87 |
| 221290-77-3 | A THR 24 A THR 25 A THR 26 A LEU 27 A HIS 41 A MET 49 A TYR 54 A ASN 119 A ASN 142 A GLY 143 A CYS 145 A HIS 164 A MET 165 A GLU 166 A LEU 167 A PRO 168 A ASP 187 A ARG 188 A GLN 189 A THR 190 A ALA 191 A GLN 192                                 | −7.87 |
| 76689-97-9  | A HIS 41 A MET 49 A PHE 140 A LEU 141 A ASN 142 A GLY 143 A SER 144 A CYS 145 A HIS 163 A HIS 164 A MET 165 A GLU 166 A LEU 167 A PRO 168 A HIS 172 A ASP 187 A ARG 188 A GLN 189 A THR 190 A ALA 191                                                | −7.86 |
| 92679-02-2  | A THR 24 A THR 25 A THR 26 A LEU 27 A HIS 41 A CYS 44 A MET 49 A PRO 52 A TYR 54 A ASN 142 A GLY 143 A CYS 145 A HIS 163 A HIS 164 A MET 165 A GLU 166 A PHE 181 A ASP 187 A ARG 188 A GLN 189                                                       | −7.86 |
| 170894-36-7 | A THR 25 A THR 26 A LEU 27 A HIS 41 A MET 49 A LEU 50 A ASN 142 A GLY 143 A CYS 145 A HIS 164 A MET 165 A GLU 166 A LEU 167 A PRO 168 A GLN 189 A THR 190 A ALA 191 A GLN 192                                                                        | −7.85 |
| 170894-37-8 | A THR 25 A THR 26 A LEU 27 A HIS 41 A MET 49 A ASN 142 A GLY 143 A CYS 145 A HIS 164 A MET 165 A GLU 166 A LEU 167 A PRO 168 A GLN 189 A THR 190 A ALA 191 A GLN 192                                                                                 | −7.84 |
| 564-16-9    | MET 49 A PHE 140 A LEU 141 A ASN 142 A GLY 143 A SER 144 A CYS 145 A HIS 163 A HIS 164 A MET 165 A GLU 166 A LEU 167 A PRO 168 A HIS 172 A GLN 189 A THR 190 A ALA 191 A GLN 192                                                                     | −7.84 |
| 129602-18-2 | A THR 25 A THR 26 A LEU 27 A HIS 41 A VAL 42 A MET 49 A PHE 140 A LEU 141 A ASN 142 A GLY 143 A CYS 145 A HIS 163 A HIS 164 A MET 165 A GLU 166 A LEU 167 A PRO 168 A HIS 172 A GLN 189 A THR 190 A ALA 191 A GLN 192                                | −7.84 |
| 142797-28-2 | A PHE 140 A LEU 141 A ASN 142 A GLY 143 A SER 144 A CYS 145 A HIS 163 A HIS 164 A MET 165 A GLU 166 A LEU 167 A PRO 168 A HIS 172 A ARG 188 A GLN 189 A THR 190 A GLN 192                                                                            | −7.83 |
| 58115-30-3  | A THR 25 A THR 26 A LEU 27 A HIS 41 A MET 49 A PHE 140 A LEU 141 A ASN 142 A GLY 143 A SER 144 A CYS 145 A HIS 163 A MET 165 A GLU 166 A LEU 167 A PRO 168 A ARG 188 A GLN 189 A THR 190 A ALA 191 A GLN 192                                         | −7.83 |
| 53755-56-9  | A THR 25 A THR 26 A LEU 27 A HIS 41 A MET 49 A PHE 140 A LEU 141 A ASN 142 A GLY 143 A SER 144 A CYS 145 A HIS 163 A HIS 164 A MET 165 A GLU 166 A LEU 167 A PRO 168 A HIS 172 A VAL 186 A ASP 187 A ARG 188 A GLN 189 A THR 190 A ALA 191 A GLN 192 | −7.83 |
| 123167-01-1 | A THR 24 A THR 25 A THR 26 A LEU 27 A HIS 41 A THR 45 A SER 46 A MET 49 A LEU 141 A ASN 142 A GLY 143 A SER 144 A CYS 145 A HIS 163 A HIS 164 A MET 165 A GLU 166 A LEU 167 A PRO 168 A ARG 188 A GLN 189 A THR 190 A ALA 191 A GLN 192              | −7.83 |
| 603125-80-0 | A THR 25 A THR 26 A LEU 27 A HIS 41 A MET 49 A ASN 142 A GLY 143 A SER 144 A CYS 145 A HIS 164 A MET 165 A GLU 166 A LEU 167 A PRO 168 A ARG 188 A GLN 189 A THR 190 A ALA 191 A GLN 192                                                             | −7.83 |

|             |                                                                                                                                                                                                                                   |       |
|-------------|-----------------------------------------------------------------------------------------------------------------------------------------------------------------------------------------------------------------------------------|-------|
| 207683-70-3 | A THR 25 A THR 26 A LEU 27 A HIS 41 A SER 46 A MET 49 A LEU 141 A ASN 142 A GLY 143 A SER 144 A CYS 145 A HIS 163 A MET 165 A GLU 166 A LEU 167 A PRO 168 A ARG 188 A GLN 189 A THR 190 A GLN 192                                 | −7.83 |
| 129893-35-2 | A PHE 140 A LEU 141 A ASN 142 A GLY 143 A SER 144 A CYS 145 A HIS 163 A HIS 164 A MET 165 A GLU 166 A LEU 167 A PRO 168 A HIS 172 A ARG 188 A GLN 189 A THR 190 A GLN 192                                                         | −7.83 |
| 137571-30-3 | A THR 24 A THR 25 A THR 26 A LEU 27 A HIS 41 A SER 46 A MET 49 A LEU 141 A ASN 142 A GLY 143 A SER 144 A CYS 145 A HIS 163 A HIS 164 A MET 165 A GLU 166 A ARG 188 A GLN 189 A THR 190                                            | −7.82 |
| 79005-82-6  | A THR 24 A THR 25 A THR 26 A LEU 27 A HIS 41 A CYS 44 A THR 45 A SER 46 A MET 49 A PHE 140 A LEU 141 A ASN 142 A GLY 143 A SER 144 A CYS 145 A HIS 163 A HIS 164 A MET 165 A GLU 166 A HIS 172 A GLN 189                          | −7.82 |
| 128298-63-5 | A PHE 140 A LEU 141 A ASN 142 A GLY 143 A SER 144 A CYS 145 A HIS 163 A HIS 164 A MET 165 A GLU 166 A LEU 167 A PRO 168 A HIS 172 A ARG 188 A GLN 189 A THR 190 A GLN 192                                                         | −7.82 |
| 64108-85-6  | A THR 24 A THR 25 A THR 26 A LEU 27 A HIS 41 A CYS 44 A SER 46 A MET 49 A PRO 52 A TYR 54 A ASN 142 A GLY 143 A CYS 145 A HIS 164 A MET 165 A GLU 166 A ASP 187 A ARG 188 A GLN 189                                               | −7.82 |
| 123154-33-6 | A THR 25 A LEU 27 A HIS 41 A MET 49 A PHE 140 A LEU 141 A ASN 142 A GLY 143 A SER 144 A CYS 145 A HIS 163 A HIS 164 A MET 165 A GLU 166 A LEU 167 A PRO 168 A GLY 170 A ASP 187 A ARG 188 A GLN 189 A THR 190 A ALA 191 A GLN 192 | −7.82 |
| 100019-24-7 | A PHE 140 A LEU 141 A ASN 142 A GLY 143 A SER 144 A CYS 145 A HIS 163 A HIS 164 A MET 165 A GLU 166 A LEU 167 A PRO 168 A HIS 172 A ARG 188 A GLN 189 A THR 190 A GLN 192                                                         | −7.81 |
| 128733-04-0 | A MET 49 A PHE 140 A LEU 141 A ASN 142 A SER 144 A CYS 145 A HIS 163 A HIS 164 A MET 165 A GLU 166 A PRO 168 A HIS 172 A ARG 188 A GLN 189 A THR 190 A ALA 191 A GLN 192                                                          | −7.79 |
| 137809-87-1 | A THR 24 A THR 25 A THR 26 A HIS 41 A CYS 44 A THR 45 A SER 46 A MET 49 A PHE 140 A LEU 141 A ASN 142 A GLY 143 A SER 144 A CYS 145 A HIS 163 A HIS 164 A MET 165 A GLU 166 A HIS 172                                             | −7.78 |
| 128819-90-9 | A MET 49 A PHE 140 A LEU 141 A ASN 142 A SER 144 A CYS 145 A HIS 163 A HIS 164 A MET 165 A GLU 166 A HIS 172 A ARG 188 A GLN 189 A THR 190 A ALA 191 A GLN 192                                                                    | −7.78 |
| 80764-19-8  | A THR 25 A HIS 41 A MET 49 A TYR 54 A PHE 140 A LEU 141 A ASN 142 A GLY 143 A SER 144 A CYS 145 A HIS 163 A HIS 164 A MET 165 A GLU 166 A LEU 167 A PRO 168 A HIS 172 A ASP 187 A ARG 188 A GLN 189 A THR 190 A ALA 191 A GLN 192 | −7.78 |
| 160796-24-7 | A THR 25 A THR 26 A LEU 27 A HIS 41 A CYS 44 A THR 45 A SER 46 A MET 49 A PHE 140 A LEU 141 A ASN 142 A GLY 143 A SER 144 A CYS 145 A HIS 163 A HIS 164 A MET 165 A GLU 166 A HIS 172 A GLN 189                                   | −7.77 |
| 133056-09-4 | A THR 24 A THR 25 A THR 26 A LEU 27 A HIS 41 A THR 45 A SER 46 A MET 49 A ASN 142 A GLY 143 A CYS 145 A MET 165 A GLU 166 A LEU 167 A PRO 168 A GLN 189                                                                           | −7.77 |

|             |                                                                                                                                                                                                                         |       |
|-------------|-------------------------------------------------------------------------------------------------------------------------------------------------------------------------------------------------------------------------|-------|
| 23235-67-8  | A HIS 41 A MET 49 A PHE 140 A LEU 141 A ASN 142 A GLY 143 A SER 144 A CYS 145 A HIS 163 A HIS 164 A MET 165 A GLU 166 A LEU 167 A PRO 168 A HIS 172 A ASP 187 A ARG 188 A GLN 189 A THR 190 A GLN 192                   | −7.76 |
| 681260-09-3 | A HIS 41 A MET 49 A ASN 142 A GLY 143 A CYS 145 A HIS 163 A HIS 164 A MET 165 A GLU 166 A PRO 168 A ARG 188 A GLN 189 A THR 190 A ALA 191 A GLN 192                                                                     | −7.76 |
| 33579-63-4  | A THR 25 A THR 26 A LEU 27 A HIS 41 A VAL 42 A MET 49 A PHE 140 A LEU 141 A ASN 142 A GLY 143 A SER 144 A CYS 145 A HIS 163 A HIS 164 A MET 165 A GLU 166 A HIS 172 A ARG 188 A GLN 189                                 | −7.76 |
| 648883-31-2 | A THR 25 A THR 26 A LEU 27 A HIS 41 A MET 49 A LEU 141 A ASN 142 A GLY 143 A SER 144 A CYS 145 A HIS 164 A MET 165 A GLU 166 A PRO 168 A ARG 188 A GLN 189 A THR 190 A GLN 192                                          | −7.75 |
| 143572-73-0 | A THR 24 A THR 25 A THR 26 A LEU 27 A HIS 41 A MET 49 A TYR 54 A PHE 140 A LEU 141 A ASN 142 A GLY 143 A CYS 145 A HIS 163 A HIS 164 A MET 165 A GLU 166 A PHE 181 A ASP 187 A ARG 188 A GLN 189                        | −7.75 |
| 159334-35-7 | A HIS 41 A MET 49 A PHE 140 A LEU 141 A ASN 142 A GLY 143 A SER 144 A CYS 145 A HIS 163 A HIS 164 A MET 165 A GLU 166 A PRO 168 A HIS 172 A GLN 189 A THR 190 A ALA 191 A GLN 192                                       | −7.75 |
| 184885-91-4 | A THR 25 A THR 26 A LEU 27 A HIS 41 A CYS 44 A THR 45 A SER 46 A MET 49 A PHE 140 A LEU 141 A ASN 142 A GLY 143 A SER 144 A CYS 145 A HIS 163 A HIS 164 A MET 165 A GLU 166 A HIS 172 A GLN 189                         | −7.74 |
| 133883-22-4 | A THR 25 A THR 26 A LEU 27 A MET 49 A PHE 140 A LEU 141 A ASN 142 A GLY 143 A SER 144 A CYS 145 A HIS 163 A HIS 164 A MET 165 A GLU 166 A LEU 167 A PRO 168 A HIS 172 A ARG 188 A GLN 189 A THR 190 A ALA 191 A GLN 192 | −7.74 |
